1           **Seasonal niche differentiation between evolutionary closely**  
2                                   **related marine bacteria**

3

4       Adrià Auladell<sup>1\*</sup>, Albert Barberán<sup>2</sup>, Ramiro Logares<sup>1</sup>, Esther Garcés<sup>1</sup>, Josep M.  
5                                   Gasol<sup>1, 3\*</sup>, Isabel Ferrera<sup>\*1,4</sup>

6

7

8       <sup>1</sup>Departament de Biologia Marina i Oceanografia, Institut de Ciències del Mar,  
9       ICM-CSIC, 08003 Barcelona, Catalunya, Spain

10

11       <sup>2</sup>Department of Environmental Science, University of Arizona, Tucson, 85721  
12       AZ, USA

13

14       <sup>3</sup>Center for Marine Ecosystems Research, School of Science, Edith Cowan  
15       University, 6027 Joondalup, WA, Australia

16

17       <sup>4</sup>Centro Oceanográfico de Málaga, Instituto Español de Oceanografía, 29640  
18       Fuengirola, Málaga, Spain

19

20       **Running title:** *Niche differentiation and seasonality of marine bacteria*

21       **Keywords:** bacterioplankton, time series, seasonality, recurrence, niche  
22       differentiation, ecotype

23

24       \*Corresponding authors: Adrià Auladell [auladell@icm.csic.es](mailto:auladell@icm.csic.es) ; Josep M. Gasol  
25       [pepgasol@icm.csic.es](mailto:pepgasol@icm.csic.es), tel. (+34) 93 230 95 00; Isabel Ferrera  
26       [isabel.ferrera@ieo.es](mailto:isabel.ferrera@ieo.es), tel. (+34) 952 19 71 24

27 **Abstract**

28

29 Bacteria are highly dynamic in marine environments, where they play key  
30 biogeochemical roles. Here, we tested how similar the niche of closely related marine  
31 bacteria is and what are the environmental parameters modulating their ecological  
32 responses in a coastal oligotrophic time series. We further explored how conserved the  
33 niche is at broader taxonomic levels. We found that, for certain genera, niche similarity  
34 decreases as nucleotide divergence increases between closely related amplicon  
35 sequence variants, a pattern compatible with selection of similar taxa through habitat  
36 filtering. Additionally, we observed evidence of niche partitioning within various genera  
37 shown by the distinct seasonal patterns of closely related taxa. At broader levels, we did  
38 not observe coherent seasonal trends at the class level, with the order and family ranks  
39 conditioned to the patterns that exist at the genus level. This study explores the  
40 coexistence of niche overlap and niche partitioning in a coastal marine environment.

41

## 42 **Introduction**

43 Marine microbial communities are highly dynamic and variable over time, particularly in  
44 temperate coastal environments. Community structure changes on a daily, monthly and  
45 annual scale due to bottom-up factors such as resource availability (including inorganic  
46 nutrients and dissolved organic carbon), top-down biotic interactions and physical  
47 properties such as temperature or day length (Fuhrman et al., 2015). The combination  
48 of all these factors defines the ecological niches in which microbes grow and reproduce  
49 depending on the metabolic potential of each taxa. Given that microbes are key players  
50 in the functioning of the biosphere, understanding how taxa adapt to these conditions  
51 and respond to environmental changes is crucial (Falkowski, 2012).

52

53 Our capability to study the composition of microbial communities has improved  
54 drastically during the last decades due to the DNA sequencing revolution. High  
55 throughput sequencing of the 16S rRNA gene has facilitated the assessment of microbial  
56 diversity in samples collected during global expeditions or from long-term monitoring  
57 stations (Buttigieg et al., 2018; Logares et al., 2020; Sunagawa et al., 2015). Notably,  
58 microbial observatories have provided time series of several consecutive years, in a  
59 crucial effort to extract robust patterns of these microbial assemblages and their  
60 dynamics. Early studies using fingerprinting methods and clone libraries had already  
61 pointed out an effect of seasonality on the whole bacterioplankton community structure  
62 (Alonso-Sáez et al., 2007; Chow et al., 2013; Cram et al., 2015); these methods however  
63 only allowed to recover the most abundant taxa. The use of massive sequencing  
64 substantially increased the throughput, generating massive amounts of sequence data  
65 that were grouped into Operational Taxonomic Units (OTUs) through sequence  
66 clustering (usually at an arbitrary cutoff often established between 97 to 99%) helping  
67 to reduce data volume, which in turn compensated for possible sequencing errors  
68 (Callahan et al., 2017). Alongside sequencing technology improvements, new  
69 bioinformatic algorithms have increased the level of resolution at which we can analyze  
70 sequence data by allowing to work with amplicon sequence variants (ASVs),  
71 differentiating up to one nucleotide difference (Callahan et al., 2016). The delineation  
72 of sequence variants has shown how an OTU can contain variants with different

73 ecological behaviors likely representing different species or ecotypes (Callahan et al.  
74 2016). For example, Eren et al. (2013) showed how the method could differentiate  
75 between two SAR11 ecotypes with only two nucleotide differences of the 16S rRNA gene  
76 that displayed anti-correlated seasonal patterns. Likewise, Chafee M. et al. (2018)  
77 showed recurrent switching of ecotypes at single nucleotide resolution during spring  
78 and summer phytoplankton blooms driven by temperature and substrate changes. In  
79 addition, studies focused on the potential association between photosynthetic  
80 picoeukaryotes and bacteria have shown how the use of ASVs has improved the  
81 association signal by identifying stronger correlations among them (Lambert et al., 2018;  
82 Needham et al., 2018).

83

84 Hutchinson proposed that an ‘n-dimensional hypervolume’ could define the niche of a  
85 species: a set of conditions under which an organism can survive and reproduce,  
86 including both biotic and abiotic factors (Hutchinson, 1957). Bacteria have adapted to  
87 the different conditions present in the marine environment through processes of  
88 selection and speciation. If two taxa occupy identical niches, a taxon should eventually  
89 outcompete the other; yet in practice, many closely related taxa coexist (Cohan, 2017).  
90 The niche would be determined both by the homogeneous selection of traits to survive  
91 in a specific environment –e.g. resistance to high salinity, an example of habitat  
92 filtering– and the heterogeneous selection for other traits to reduce competition –i.e.  
93 niche partitioning– that would facilitate coexistence. In closely related taxa, their  
94 distribution can inform on whether two taxa display a similar realized niche –the abiotic  
95 conditions together with the interaction of biotic factors such as competition– or if  
96 ecotype differentiation occurred through niche partitioning. In this sense, time series of  
97 marine microbial observatories are useful for identifying taxa with similar realized  
98 niches through co-occurrence analyses with repeated sampling over time (Friedman &  
99 Alm, 2012). Additionally, and while niches are commonly considered as features of  
100 species, we can extend the definition of the Hutchinsonian niche to broader taxonomical  
101 groups and evaluate the importance of the shared traits within each group and their  
102 responses to the environment (Tromas et al., 2018). Such an analysis at different  
103 taxonomical levels concur with studies that discuss the importance of the ‘phylogenetic  
104 scale’ (Ladau & Elie-Fadrosh, 2019; Martiny et al., 2015) at which ecology operates. For

105 marine bacteria, it is unclear how niche similarity and the seasonal trends are distributed  
106 at wider taxonomic levels such as family, order or class. Yet, the methodology required  
107 to address these questions is nowadays available.

108

109 Here, we used time series data from a coastal marine observatory in the NW  
110 Mediterranean to describe the long-term seasonal trends in bacterial community  
111 structure. First, we focused on determining niche similarity between ASVs within genera  
112 and later extended the comparison to broader taxonomic levels to answer (1) how many  
113 ASVs are seasonal and what is the temporal distribution of the relevant taxonomic  
114 groups, (2) how similar the niche between closely related ASVs within different marine  
115 genera is and what are the environmental parameters modulating their distinct  
116 ecological responses, and (3) how conserved the realized niche is as we move from  
117 genus to broader taxonomic levels (i.e., family, order and class).

118

## 119 **Results**

120 **Environmental, ecological and taxonomic context.** Surface water temperature at  
121 Blanes Bay varied seasonally, with minimal mean values in February (12.6°C) and  
122 maximal values in August (24.5°C, Supplementary Figure 1). Inorganic nutrients were  
123 higher during autumn and winter while Chlorophyll *a* reached the highest values (ca. 1  
124 mg·m<sup>-3</sup>) during the winter-spring period. A detailed description of the seasonality at  
125 Blanes Bay, including these and other environmental parameters, can be found in Gasol  
126 et al. (2016).

127

128 In the 11 years of monthly data, we detected a total of 6,825 ASVs. The ASV distribution  
129 was compared both by occurrence (narrow, intermediate and broad) and abundance  
130 (abundant, rare; see Material and Methods). Most of the them (91%) displayed a narrow  
131 distribution, occurring in less than 10% of the samples (Figure 1A, Table 1). Only 26 ASVs  
132 displayed a broad distribution ( $\geq 75\%$  occurrence), 3 of them always belonging to the  
133 rare fraction (i.e.  $< 1\%$ ). Taxonomically, among the broad ASVs, 19 belonged to the  
134 Alphaproteobacteria, mostly to the orders Pelagibacterales (13 ASVs) and HIMB59 (4

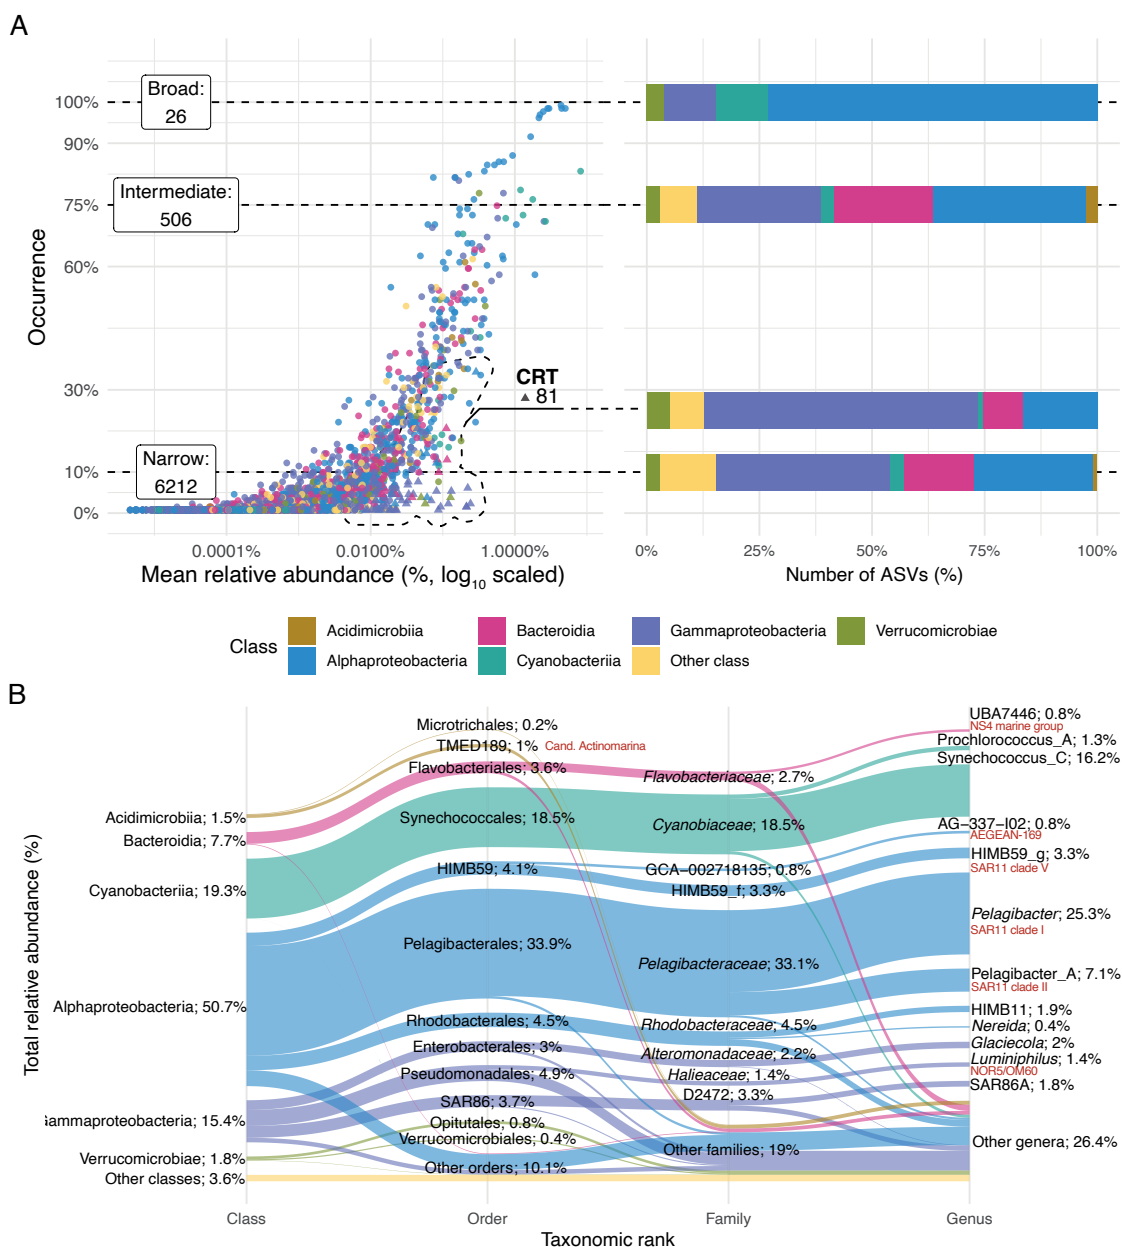

135

136 **Figure 1:** A) Distribution of the different ecological ASVs types (broad, narrow or intermediate,

137 and conditionally rare taxa, CRT). The X axis indicates the occurrence (% of samples) and the Y

138 axis corresponds to the mean relative abundance (%) over the time series. Dotted lines

139 delimitate the distributions (in the label the numbers of ASVs of each type are displayed) and

140 connect to a box indicating the number of ASVs for each distribution and a bar plot colored by

141 taxonomy at the class rank. B) Alluvial plot showing the total relative abundance distribution of

142 Blanes Bay taxa across different taxonomic ranks (class, order, family and genus). The height of

143 the sections displays the relative abundance (indicated in the text; the total is 100%). The SILVA

144 nomenclature is displayed in red next to the corresponding GTDB database nomenclature, used

145 in the text in those cases in which there is no similarity in the names.

146

### Occurrence and relative abundance distribution in the BBMO bacterial community

| Distribution <sup>1</sup> | Count ASVs | Count CRT | Seasonal ASVs <sup>2</sup> | Median occurrence | Relative abundance |
|---------------------------|------------|-----------|----------------------------|-------------------|--------------------|
| <b>Abundant</b>           |            |           |                            |                   |                    |
| Broad                     | 23         | 0         | 7                          | 85.5%             | 44.6%              |
| Intermediate              | 139        | 0         | 102                        | 40.5%             | 31.8%              |
| Narrow                    | 11         | 0         | 0                          | 7.6%              | 0.2%               |
| CRT                       | 81         | 81        | 4                          | 3.1%              | 5.0%               |
| <b>Rare</b>               |            |           |                            |                   |                    |
| Broad                     | 3          | 0         | 0                          | 81.7%             | 0.4%               |
| Intermediate              | 367        | 0         | 174                        | 18.3%             | 12.4%              |
| Narrow                    | 6201       | 0         | 10                         | 0.8%              | 5.7%               |

<sup>1</sup> Broad = in >75% of samples, Narrow = in <10% samples, Intermediate = in-between

<sup>2</sup> Seasonality based in lomb scargle test. PN>10, q<0.01

147

148

149 **Table 1:** Occurrence and median relative abundance for the ASVs in the Blanes Bay Microbial  
 150 Observatory dataset. Distribution specifies the occurrence distribution: broad ( $\geq 75\%$  samples),  
 151 narrow (<10% samples) and intermediate. The results are distributed between abundant ( $\geq 1\%$   
 152 in at least one sample) and rare ASVs. Count ASVs stands for the number of ASVs; Count CRT,  
 153 the number of Conditionally Rare Taxa; seasonal ASVs, the count of seasonal ASVs (based in  
 154 lomb scargle test,  $q \leq 0.01$ ,  $PN \geq 10$ ); median occurrence, the % of samples in which the ASVs  
 155 appears; total relative abundance of the group.

156

157

158

159

160

161

162

163

164

165

166

167 ASVs; former SAR11 clade V; See Supplementary Table 1 for the ASV taxonomic  
168 information and Supplementary Table 2 for the correspondence between GTDB and  
169 SILVA nomenclature). The 506 ASVs with intermediate occurrence (<75% and >10%  
170 occurrence) belonged taxonomically to 20 different classes. The dominant classes were  
171 the Alphaproteobacteria and Gammaproteobacteria (163 and 133 ASVs respectively)  
172 followed by Bacteroidia (106 ASVs), mostly the Flavobacteriales order (91 ASVs; Figure  
173 1A). The ASVs with a narrow distribution displayed a similar taxonomic composition. We  
174 also evaluated the ASVs that were rare but occasionally became abundant (Conditionally  
175 Rare Taxa, CRT, see Material and Methods) and found a total of 81 ASVs that met this  
176 criterion. Gammaproteobacteria (48 ASVs) and Alphaproteobacteria (13) were the most  
177 common CRTs, while the rest belonged to the Verrucomicrobiae and Bacteroidia classes  
178 (Figure 1B).

179

180 Spring and summer displayed less alpha diversity than autumn and winter ( $\alpha$  richness  
181 estimates = 197 vs 334 ASVs respectively,  $p < 0.01$ ; Supplementary Figure 2). When  
182 checked at the month level, with January as intercept, we observed a significant  
183 decrease in richness starting in April (232 ASVs,  $p = 0.015$ ) to regain higher values in  
184 October (316 ASVs,  $p = 0.87$ ). Regarding beta diversity (i.e. community similarity), the  
185 seasons with the maximal dissimilarity were summer and winter ( $\beta$  Bray Curtis estimate  
186 = 0.48, standard error = 0.036), being autumn and spring the ones with the lowest  
187 difference ( $\beta$  estimate = 0.21, standard error = 0.047; Supplementary Figure 3), with  
188 similar ranges for all the other comparisons.

189

190 **ASV seasonality.** A total of 297 ASVs displayed high seasonality (lomb scargle test  $q \leq$   
191 0.01,  $PN \geq 10$ ) with different ranges of occurrence and season maxima. These seasonal  
192 ASVs represented on average 47% of the relative abundance, partitioned in 13% of the  
193 abundance from ASVs exhibiting broad distribution, 34% of intermediate occurrence  
194 and 0.1% of narrow presence. In our study, significant peak normalized power values –  
195 a statistic that measures how strong is the recurrence– ranged between 10 and 43.1.  
196 The highest values corresponded to ASVs with distributions that recurrently presented  
197 a peak in one specific season. Examples of this pattern are ASV122, ASV55 and ASV131,  
198 belonging to the Acidimicrobiia, Bacteroidia and Alphaproteobacteria classes



199 respectively (Supplementary Figure 4). These ASVs appeared mostly during winter and  
200 fall and were absent from spring and summer. Within the seasonal ASVs, we  
201 differentiated 3 significantly different clusters (Supplementary Figure 5). The first group,  
202 composed of 23 ASVs, includes most of the broadly distributed ASVs that peaked during  
203 summer and autumn. Taxonomically, this cluster was composed for the most part of  
204 ASVs from *Cyanobiaceae* and *Flavobacteriaceae*. The second cluster, with 30 ASVs,  
205 includes those ASVs that peaked during winter and spring, mainly *Pelagibacteraceae*  
206 ASVs. Interestingly, this cluster includes an understudied group, *Marinisoma*, that  
207 displayed a winter trend in all its seasonal ASVs (5 out of 9 ASVs). Finally, the last cluster  
208 was composed of 244 ASVs that presented a less clear seasonal trend likely due to their  
209 lower occurrence and relative abundance along the decade, with no dominance of any  
210 particular taxonomic group.

211

212 Out of the 297 seasonal ASVs, we identified 131 ASVs that could be clustered into 42  
213 OTUs at 99% identity. We found examples of different behaviors within various genera.  
214 For example, *Pelagibacter* was represented by 20 different OTUs; 3 of them were  
215 composed of only seasonal ASVs, 6 OTUs contained both seasonal and non-seasonal  
216 ASVs, and 9 OTUs consisted only of non-seasonal ASVs. Similar trends were observed for  
217 other genera such as SAR86A and *Luminiphilus*. On the other hand, we found that niche  
218 partitioning was not common, with only 20% of the OTUs displaying seasonal ASVs with  
219 clear partition between seasons. In total, 8 ASVs displayed such behavior; that is,  
220 seasonal ASVs within 5 nucleotide differences, displaying relative abundances with  
221 opposed seasonal trends or with different temporal patterns (see some examples in  
222 Figure 2). Most of these patterns could be classified into either an almost complete  
223 temporal separation (e.g. ASV48 vs ASV30 within OTU30, affiliated to Puniceispirillales;  
224 Figure 2) or restriction of the “temporal” niche (one of the ASVs is only present in a  
225 specific month or season although the other is also present; e.g. ASV285 vs ASV337  
226 within OTU243, affiliated to HIMB59). In fact, seven out of 8 ASVs displayed the latter  
227 pattern of seasonal restriction.

228

229

230

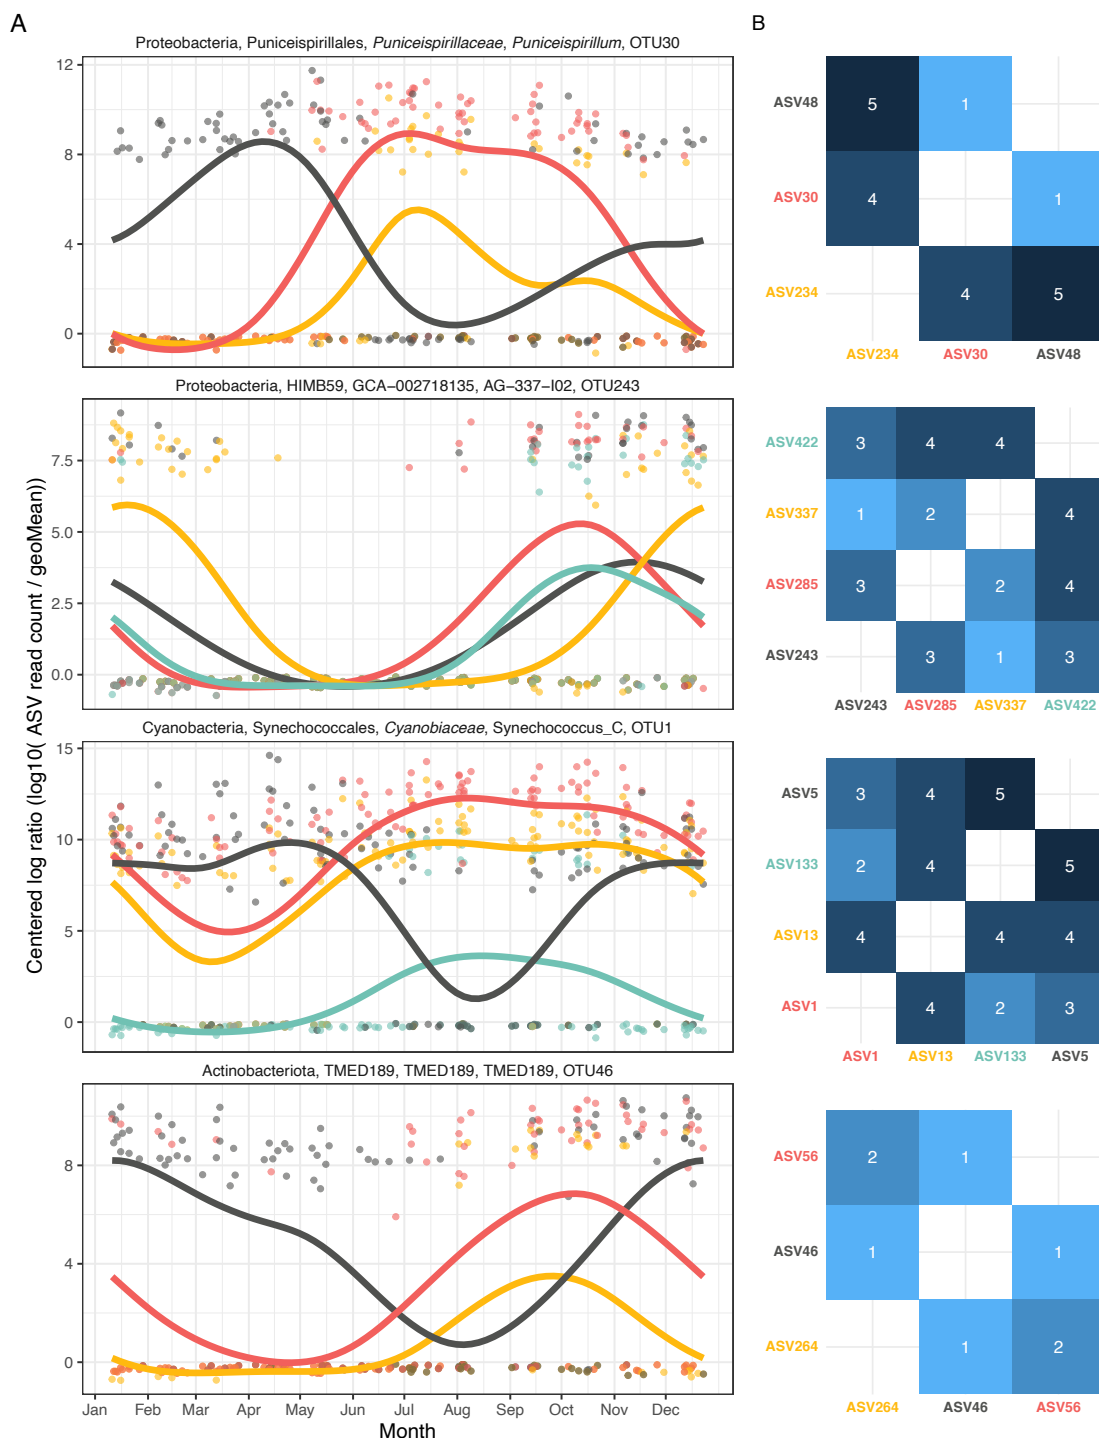

231

232 **Figure 2:** A) Examples of niche partitioning among closely related ASVs within the same OTU  
 233 (99% clustering). The X axis presents the month and the Y axis presents the centered logarithm  
 234 ratio abundance. A generalized additive model smooth is adjusted to the data points. B)  
 235 Heatmaps presenting the nucleotide divergence between each of the ASVs (number of  
 236 mismatches after alignment). Five nucleotide divergence equals to a median sequence identity  
 237 of 98.8%.

238 **Variability of niche preference within genera.** Here, we define the ecological niche of a  
239 taxon as the set of conditions (biotic and abiotic factors) that fluctuate recurrently in  
240 this marine temperate coastal environment and that allow the growth of the organism  
241 or its persistence. Taxa display niche preferences, and hypothetically, closely related  
242 taxa should have similar niches (Cohan, 2017). A similar ecological niche in two taxa  
243 would be represented by the shared environmental conditions that vary over time. In  
244 the case that niche overlap exists, cooccurrence and covariance would point to niche  
245 similarity, and exclusion situations would indicate the opposite condition, i.e. niche  
246 partitioning. Our proxy to test for niche overlap among closely related taxa is the Rho  
247 measurement (proportional change between two taxa, see Material and Methods), that  
248 can be expressed as a function of the nucleotide divergence (number of nucleotide  
249 substitutions between two sequences after an alignment). A decrease in Rho with  
250 nucleotide distance means that the taxa decrease their covariance, and therefore  
251 behave less similarly as they become more phylogenetically distinct.

252

253 Out of the 13 genera evaluated, we found that *Pelagibacter* (Alphaproteobacteria,  
254 SAR11 clade I), *Pelagibacter\_A* (Alphaproteobacteria, SAR11 clade II) and SAR86A  
255 (Gammaproteobacteria, a subclade of SAR86) displayed a significant decrease in Rho  
256 proportionality with increasing nucleotide divergence (Figure 3; See Supplementary  
257 Table 3 for the regression statistics). The linear tendency between Rho and the  
258 nucleotide distance explained on average about 13% of the trend in Rho. The  
259 distributions within each genus were highly variable. The *Pelagibacter* genus displayed  
260 the highest number of ASVs (60) and the variation in the Rho score was likewise the  
261 highest, between 0.996 and 0.3. The *Pelagibacter\_A* genus presented less ASVs (26) than  
262 *Pelagibacter* but a similar Rho distribution. The SAR86A had a smaller amount of  
263 variation along the nucleotide change, with a maximum Rho of 0.85. Besides the 3  
264 abovementioned genera, *Luminiphilus* (OM60/NOR5 clade) also displayed a negative  
265 tendency but the relationship was not statistically significant. The *Synechococcus* genus  
266 displayed similarly high proportionality values at low and high nucleotide distances, not  
267 showing a decreasing trend. Merging all the non-significant groups, the values did also  
268 not present a significant tendency (data not shown), suggesting that the decrease is  
269 specific of some groups.

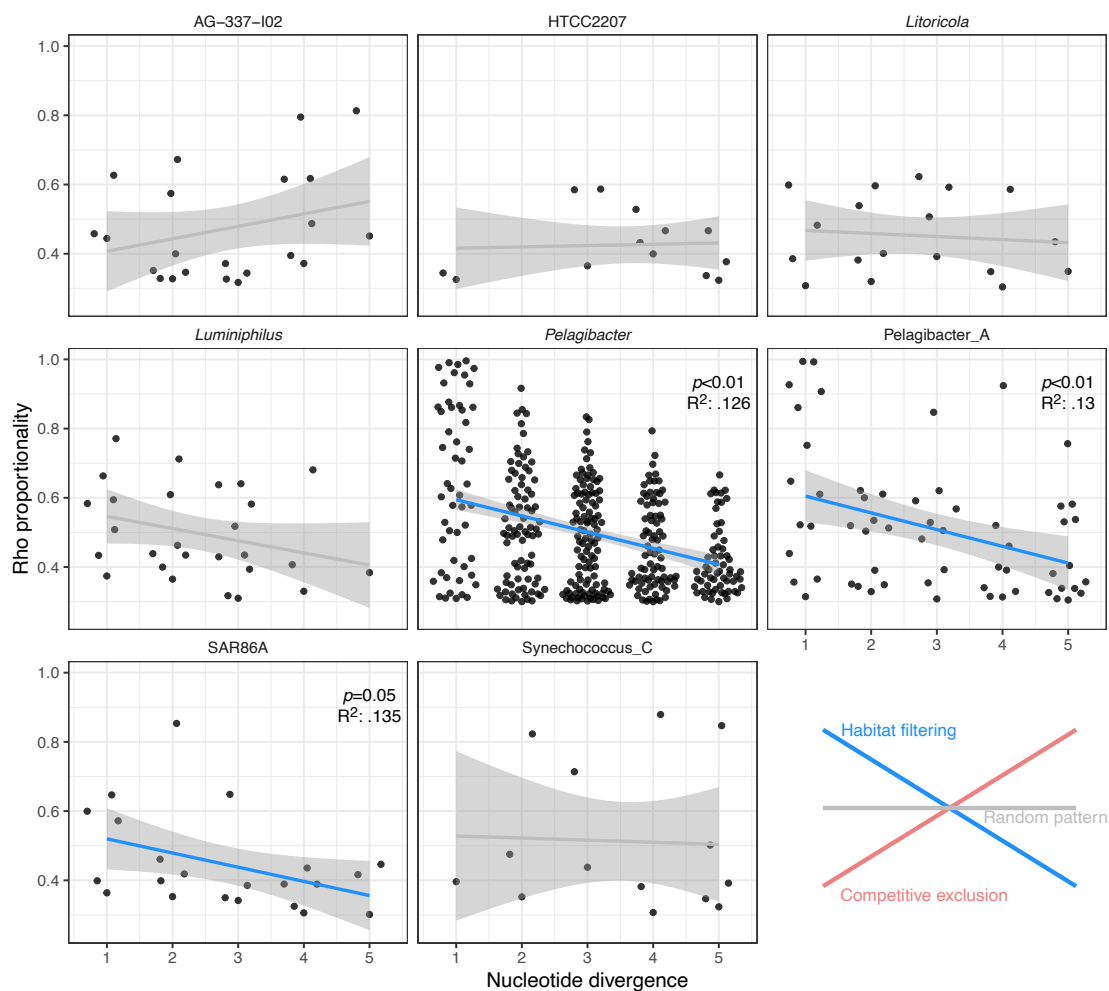

270

271

272 **Figure 3:** Relationship between the proportionality of change (Rho, Y axis) and the nucleotide  
273 divergence (mismatches after alignment, X axis). Only genera with more than 3 ASVs at less than  
274 5 nucleotide divergence were evaluated. Lines represent the linear relationship between the  
275 two variables. The blue color indicates statistical significance. The  $p$  value and the  $R^2$  are  
276 displayed for the significant regressions. Bottom right: a graphical visualization of the different  
277 potential ecological patterns. See Supplementary Table 2 for the correspondence between  
278 GTDB and SILVA nomenclature.

279

280

281

282

283

284

285 **Environmental drivers of the observed niche differences within genera.** Given the  
286 identified differences in the temporal niche (i.e. the time of the year when the organism  
287 develops) among closely related ASVs, we further evaluated how different  
288 environmental parameters influenced the observed distributions. For each ASV-  
289 parameter pair we generated a model and estimated coefficient indicating how the ASV  
290 responded (increase or decrease in abundance, Figure 4, Supplementary Figure 6). A  
291 total of 245 response models between ASV abundances and environmental parameters  
292 out of the 603 possible were significant ( $FDR \leq 0.05$ ). About two-thirds of the models  
293 were polynomial with the rest being linear. Temperature, nitrite and nitrate  
294 concentrations were the parameters appearing most often in significant models,  
295 followed by the abundance of photosynthetic and heterotrophic nanoflagellates. The  
296 different bacterial genera displayed variability in the responses to the various  
297 parameters. *Pelagibacter*, AG-337-I02 (AEGEAN-169 marine group), D2472 (SAR86) and  
298 *Luminiphilus* genera had ASVs that responded cohesively, i.e. that displayed the same  
299 response sign to a given environmental variability for all their ASVs (Supplementary  
300 Figure 6). Most of these bacterial genera showed a negative relative abundance  
301 response to temperature and a positive relationship with the concentration of inorganic  
302 nitrogen compounds. The exception to this trend was *Luminiphilus*, with the opposite  
303 coefficient sign for all parameters tested. HIMB59 (former SAR11 clade V),  
304 *Pelagibacter\_A*, SAR86A and *Synechococcus* showed differences within each genus,  
305 pointing to the existence of distinct ecotypes (Figure 4A). Temperature was a main  
306 factor determining these ecotype differences. Within SAR86A, two contrasting patterns  
307 could be observed; ASV34 and ASV63 (nucleotide divergence of 1; Supplementary Figure  
308 7) presented a positive relationship to temperature and a negative one to nitrate and  
309 chlorophyll *a* concentration, while ASV562, ASV270, ASV65 and ASV157 presented the  
310 opposite responses (these ASVs had nucleotide distances ranging from 1 to 9; Figure  
311 4A). In the case of *Synechococcus*, a similar trend was observed (ASV5 and ASV12 vs.  
312 ASV1 and ASV13, Figure 4) but the nucleotide distances do not hint to a possible  
313 explanation based on phylogenetic distance, a result coincident with that of the previous  
314 section in which no decrease in niche similarity for this group was observed (Figure 3).  
315 *Pelagibacter\_A* also presented two ecotype-specific responses, with ASV6 and ASV10 (1  
316 nucleotide divergence) responding similarly, in contrast to the other significant ASVs

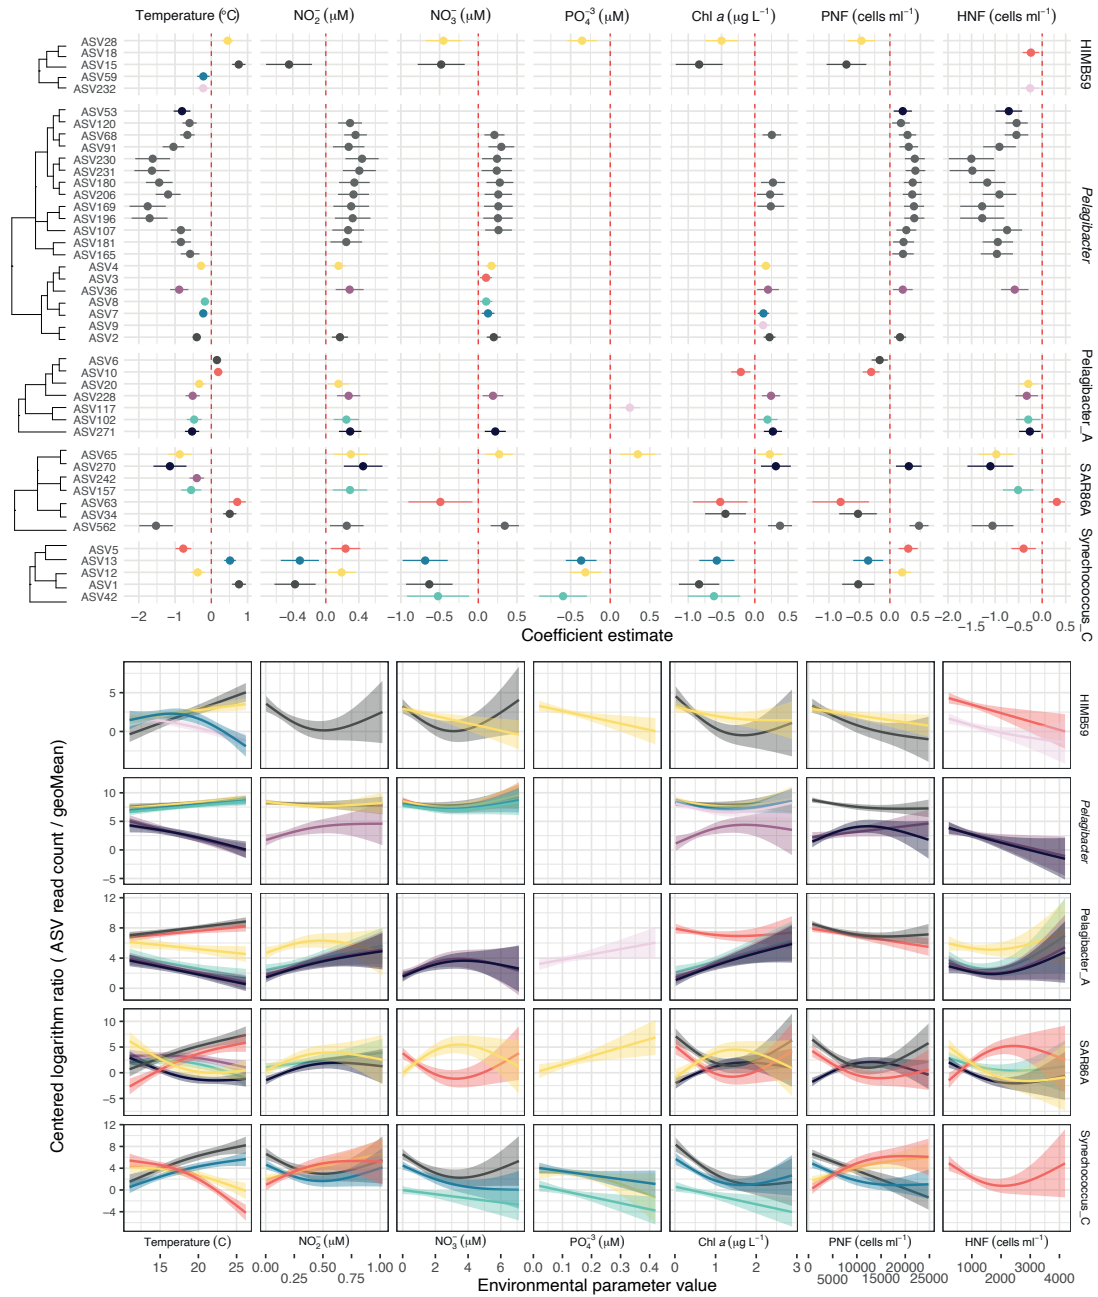

317

318 **Figure 4:** A) Significant *corncob* models between ASVs from HIMB59, *Pelagibacter*,  
 319 *Pelagibacter\_A*, SAR86 and *Synechococcus* genera (rows) and various environmental parameters  
 320 (columns). The coefficient estimate indicates positive or negative responses to the parameter  
 321 and is shown with a 95% confidence interval. The color corresponds to the different ASV within  
 322 a genus (only the top 8 more abundant ASVs are colored, the other ASVs are shown in grey).  
 323 ASVs are ordered through a hierarchical clustering based on nucleotide divergence. B)  
 324 Generalized additive model fits between the ASV centered logarithm ratio abundances and the  
 325 parameter value distribution for the significant ASVs in the upper plot. Panels and ASV colors  
 326 shown as in the upper plot. PNF: Phototrophic nanoflagelates; HNF: Heterotrophic  
 327 nanoflagelates.

328 within the genus (Figure 4). Finally, the different ASVs belonging to HIMB59 (former  
329 SAR11 clade V) presented multiple responses, pointing to a differentiated ecotype  
330 distribution.

331

332 **Seasonality at broad taxonomical levels.** Having delineated how the ASVs behave  
333 seasonally and what are the drivers of the differences within each genus, we tested  
334 whether synchronized responses at higher taxonomic levels exist. Theoretically,  
335 cohesiveness should decrease from the genus to higher taxonomic ranks. We randomly  
336 aggregated 80% of the ASVs at the genus, family, order and class levels to test how this  
337 seasonal statistic was distributed. We only considered Alphaproteobacteria,  
338 Gammaproteobacteria and Bacteroidia since these were the classes with enough  
339 representation down to the genus rank (only levels with >10 ASVs were considered).  
340 When we analyzed the general distribution across ranks, we found that the class rank  
341 was mostly non-seasonal (98.9% PN values,  $p < 0.01$ ,  $PN < 10$ ; Figure 5). Both the order  
342 and family ranks displayed a similar distribution with ~50% of the results being seasonal,  
343 while this value increased up to ~60% at the genus rank. These distributions were  
344 different for each class, with Alphaproteobacteria presenting a clear bimodality while  
345 Gammaproteobacteria presented values evenly distributed across the PN statistic  
346 (Figure 5). By checking each level separately, the bulk Alphaproteobacteria class  
347 distribution (Supplementary Figure 8, PN mean = 5.3) could be linked directly to that of  
348 the Pelagibacterales order, since this was the most abundant group (Supplementary  
349 Figure 8B) and appeared as non-seasonal (PN mean = 5.7, Supplementary Figure 8A).  
350 Observing the other prevalent orders (Rhodobacterales, Puniceispirillales –SAR116  
351 clade– and HIMB59), the seasonality statistic was quite robust when randomly removing  
352 different ASVs (Supplementary Figure 8). Puniceispirillales for example appeared mostly  
353 during summer. This observation was different for the Gammaproteobacteria orders  
354 (Supplementary Figure 9A), with SAR86 and Pseudomonadales orders close to the  
355 seasonality threshold resulting in half of the randomizations as non-seasonal. Moreover,  
356 for the Pseudomonadales order, we observed that it was composed of various families,  
357 each with different seasonality (Supplementary Figure 9B). The Bacteroidia class only  
358 showed seasonality at the genus level for UBA7446, a new unknown genus within the  
359 family *Flavobacteriaceae* (Supplementary Figure 10). Thus, we observed that the

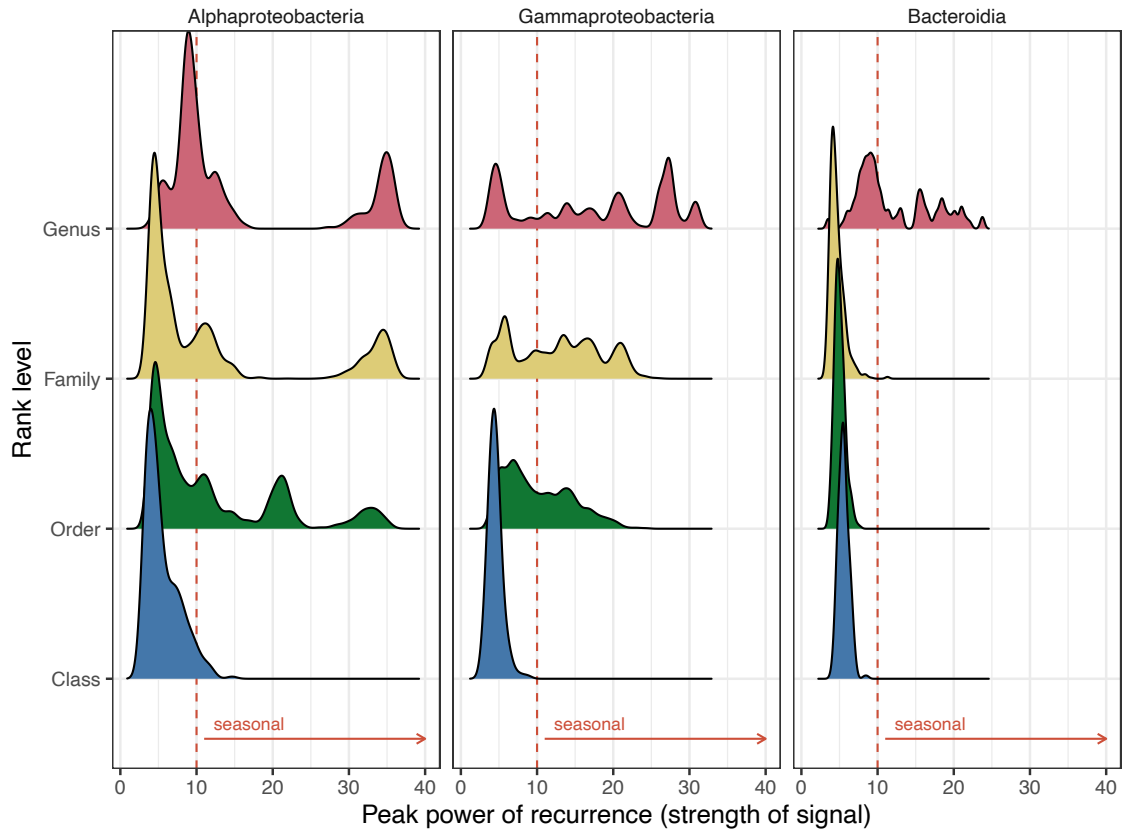

360

361 **Figure 5:** Density distribution of the peak normalized power statistic (as proxy for seasonality)

362 for each rank level in the Alphaproteobacteria, Gammaproteobacteria and Bacteroidia classes.

363 The red line indicates the used threshold for seasonality ( $q \leq 0.01$  and  $PN \geq 10$ ).

364

365

366

367

368

369

370

371

372

373

374

375

376



377 distributions at the order level were diametrically different, with Alphaproteobacteria  
378 including orders that were seasonal, Gammaproteobacteria orders presenting a peak in  
379 the limit of seasonality and all orders of Bacteroidia presenting a non-seasonal trend.  
380 Nevertheless, in most groups the family and genus ranks presented similar seasonal  
381 trends to those displayed by the order they belonged to.

382

## 383 **Discussion**

384 We explored how the bacterial community is structured seasonally at fine taxonomical  
385 levels and whether the structure is maintained at broader levels through long-term  
386 sampling and amplicon sequencing in a temperate marine coastal environment.  
387 Specifically, we wanted to understand how closely related ASVs respond to the  
388 environmental conditions that appear recurrently in the site. Overall, our results show  
389 that around half of the total community relative abundance shows seasonality at the  
390 ASV level. Within genus, we show how niche similarity decreases with increasing  
391 nucleotide divergence for at least 3 genera, while other trends were observed in other  
392 groups. We then checked how various environmental parameters define the niche for  
393 the components of various genera. Finally, we analyzed how the patterns of seasonality  
394 aggregate at the broader taxonomic ranks, showing that, in our dataset, the class levels  
395 were non-seasonal and that the other ranks tested (i.e. order and family) present a  
396 variety of trends.

397

398 Before further considerations, a methodological limitation must be discussed. The use  
399 of amplicon marker gene has its limitations for the delineation of biological units  
400 (VanInsberghe et al., 2020). The use of hypervariable regions of the 16S rRNA gene –in  
401 this case the V3-V4 regions– entails problems regarding the level of taxonomic  
402 resolution that can be determined. In fact, VanInsberghe et al. (2020) showed that for  
403 *Vibrio* sp. only 7 out of 14 species were distinguishable with 100% full length 16S rRNA  
404 gene sequence, implying that a shorter region would be even less informative. The  
405 power of the 16S rRNA gene to resolve closely related taxa changes for different  
406 bacterial clades, but in general, various studies have shown that the variable regions  
407 have a poor resolution for full species delineation (Johnson et al., 2019; VanInsberghe

408 et al., 2020). Nevertheless, despite the abovementioned limitations, amplicon marker  
409 gene sequencing still represents the fastest and most comprehensive approach for  
410 studying ecological patterns through identifying robust trends in large datasets. To stay  
411 on the conservative side in our interpretations, we set the genus level as the one for  
412 which we can assign patterns with some certainty.

413

414 **Contrasting environmental conditions throughout the year.** The environmental  
415 parameters displayed a clear seasonal pattern, with the highest rates of change between  
416 the summer and winter periods, and the bacterial community mirrored these changes  
417 as observed in alpha and beta diversities. The patterns of alpha and beta diversity were  
418 studied before at our study site but in much shorter surveys (1-2 years; Alonso-Sáez et  
419 al. 2007; Mestre et al. 2017). The analysis of eleven years of data unveiled that the  
420 highest differences in community structure occur between summer and winter, and the  
421 highest variability is found in spring and winter, which could be related to the  
422 idiosyncratic phytoplankton blooms that occur during these periods, with differing  
423 intensity over the decade (Nunes et al. 2018; see also PNF in Supplementary Figure 1).

424

425 In the nearby long-term microbial station SOLA (Banyuls-sur-Mer), a seven-year  
426 seasonal study was performed comparing the bacterial, eukaryotic and archaeal  
427 community through ASV delineation (Lambert et al., 2018). The number of ASVs in the  
428 bacterial community was similar to that observed in this study (6825 ASVs in this study  
429 vs 6242 at SOLA) and a similar community composition was observed, for e.g. both  
430 Pelagibacteraceae and Synechococcales dominated the communities (Figure 1, Lambert  
431 et al. 2018), with *Pelagibacter*, *Pelagibacter\_A* and *Synechococcus\_C* being the most  
432 prevalent organisms. However, some differences were detected; a relevant group in  
433 our study was the HIMB59 order, initially considered part of the SAR11 clade V (Martijn  
434 et al., 2018; Viklund et al., 2013), which was remarkably absent in the SOLA study  
435 (Lambert et al., 2018; Salter et al., 2015). This result could be either the reflect of a  
436 different taxonomic assignation or related to primer biases. In fact, this group has been  
437 assigned a variety of names and phylogenetic positions; the MAGs within the HIMB59  
438 order were identical at the 16S rRNA level with what was previously described as the  
439 AEGEAN-169 marine group, which is present in surface and deep waters in a variety of

440 coastal sites (Alonso-Sáez et al., 2007; Cram et al., 2015), while in the SILVA classification  
441 AEGEAN-169 appears within the Rhodospirillales order. Martijn et al. (2018), however,  
442 concluded that the HIMB59 and other relevant MAGs conform a separate clade neither  
443 within the Pelagibacterales nor the Rhodospirillales, in agreement with the Genome  
444 Taxonomy Database assignation used here. Previous studies may have pooled HIMB59  
445 into groups other than SAR11 clade V, hiding its presence. Another difference was the  
446 presence of SAR11 clade IV, not detected in our study but present in SOLA. Other  
447 relevant groups present in this study at Blanes Bay were *Candidatus Actinomarina*, a  
448 group within class Acidimicrobiia with small cells (Ghai et al., 2013), *Glaciacola* and  
449 HIMB11 (*Roseobacter* clade), all of them representing  $\geq 1\%$  of the total relative  
450 abundance.

451

452 **Half of the total community is seasonal.** Determining seasonality is not trivial, as it  
453 implies to take a binary decision for a trait that is likely continuous in a gradient rather  
454 than into two states. In our analysis, we found a total of 297 seasonal ASVs (34% of the  
455 evaluated ASVs, which made up a total of 47% of the sequences). A lower value was  
456 observed by Giner et al. (2019) in a 10-year study of microbial eukaryotes at the Blanes  
457 Bay (13-19% of the OTUs depending on the analyzed size fraction, and ca. 40% of the  
458 sequences). Besides the distinct nature of prokaryotes and eukaryotes, this disparity  
459 could be explained by the differences in the data analysis, since Giner et al. (2019) used  
460 99% clustering OTUs instead of ASVs and quantified recurrence using a metric developed  
461 of their own. Nevertheless, the number of seasonal ASVs we observed in bacteria  
462 triplicates the results found by Lambert et al. (2018) (89 ASVs), and the total relative  
463 abundance of seasonal organisms was also higher in our study compared to that  
464 observed at the SOLA station (47% vs 31.3%). Since we followed identical statistical  
465 methodologies and there is relatively high similarity between the environmental  
466 parameters and the number of ASVs, the observed differences were somehow  
467 surprising. A possible explanation could be related to the amplicon resolution, since for  
468 bacteria, Lambert et al. (2018) reported sequencing problems for the reverse  
469 complement pairs of Illumina sequencing (R2), analyzing thus 300 nucleotides instead  
470 of 490 as in here. Yet, this could explain a coarser taxonomy but not the changes in the  
471 total relative abundances of seasonal ASVs. The length of the time series was similar (7

472 years vs 11 years) and the sampling scheme, with biweekly sampling, could result to a  
473 certain degree in the disparities observed. Another explanation could derive from the  
474 presence of more irregular river discharges in the Banyuls basin, affecting the recurrence  
475 of the community through more variable salinity levels (Guizien et al., 2007). In any  
476 case, further studies would be needed to find a possible explanation for this discrepancy.

477

478 The seasonal patterns observed in our time series varied between different taxonomic  
479 groups (Supplementary Figure 5). *Pelagibacter\_A* (SAR11 clade II) did not present  
480 seasonal ASVs. This result contrasts with what was observed in the Bermuda Atlantic  
481 Time series (BATS), in which this group is present mostly during spring (Giovannoni,  
482 2017). On the other hand, AG-337-I02 (order HIMB59) peaked during winter, coinciding  
483 with what was observed at BATS (using SAR11 clade V as the group nomenclature).  
484 Nevertheless, the biogeochemical setting, physical forcing and other environmental  
485 factors that could control the temporal dynamics at BATS (Steinberg et al., 2001) are  
486 quite different from those of the coastal NW Mediterranean. Besides, HIMB114 (SAR11  
487 clade III) in our study presented peak abundances during summer, a result also observed  
488 in Banyuls-sur-Mer (Salter et al., 2015). Overall, the observed differences in seasonal  
489 patterns among different sites point to the need of a deeper exploration of the niche of  
490 these groups, to investigate whether these differences have an ecological meaning or  
491 are due to methodological aspects.

492

493 **Niche similarity decreases with genetic distance.** A clear trend between niche similarity  
494 and nucleotide divergence was detected for *Pelagibacter*, *Pelagibacter\_A* and SAR86A.  
495 All these groups (i.e. SAR11 clade I and II) are known to contain many species with  
496 streamlined genomes and oligotrophic lifestyles (Dupont et al., 2012; Giovannoni,  
497 2017). The pattern observed within these groups is consistent with habitat filtering  
498 (selection), in which similar niches are occupied by the same or genetically similar taxa.  
499 This pattern has already been observed in other environments (Horner-Devine &  
500 Bohannan, 2006; Tromas et al., 2018) and, interestingly, in our study we only observed  
501 it for groups with small genomes, which could be more affected by niche specialization.  
502 It is in fact unclear if closely related taxa compete. The evolution and diversification of  
503 traits between closely related taxa would allow their coexistence maintaining

504 simultaneously the same realized niche (Martiny et al. 2015) as it was observed in our  
505 study for certain taxa. Trait diversification could arise from horizontal gene transfer  
506 events creating a larger pangenome for the different ecotypes. This in fact has been  
507 shown for *Pelagibacter*, from which the distinct genomes conforming its pangenome  
508 present differences in accessory genes between ecotypes with a 99.4% 16S rRNA gene  
509 identity (which corresponds to ~3 nucleotide divergences in our study; Delmont et al.  
510 2019). Actually, we only detected a niche similarity pattern for *Pelagibacter*,  
511 *Pelagibacter\_A* and SAR86A. Yet, we could have missed it for other genera due to lack  
512 of statistical power associated with sequencing depth. Thus, in order to determine if the  
513 niche similarity pattern is a common trait for all genera, we aggregated the non-  
514 significant values of all other genera detected in our study (details not shown) resulting  
515 in a non-significant pattern, and therefore, based on our data, we cannot conclude that  
516 this is a common pattern for marine bacteria. Nevertheless, we were able to describe  
517 how niche preference changes in relation to phylogenetic distance for three relevant  
518 marine groups. To dig further into the patterns of other groups, deeper sequencing or  
519 the sequencing of a larger 16SrRNA gene fragment is needed in order to improve the  
520 resolution and the number of variants obtained (Callahan et al., 2019, 2020).

521

522 When we checked how the individual ASVs responded to the measured environmental  
523 variables, we found two types of responses at the genus level: groups where all the ASVs  
524 displayed a similar response, such as *Pelagibacter*, AG-337-I02 (AEGEAN-169), D2472  
525 (SAR86) and *Luminiphilus*, and groups with ASVs presenting niche differentiation, such  
526 as *Synechococcus* and SAR86A. The groups presenting the same patterns varied in the  
527 response; in the case of *Pelagibacter*, there was a clear distinction between the seasonal  
528 ecotypes and the ones appearing all year round (e.g. in Figure 4, the *Pelagibacter*  
529 dendrogram presents two clusters). The genera with distinct responses showed ecotype  
530 differentiation through niche partitioning processes. As an example, *Synechococcus*  
531 included ASVs with a positive response to temperature and other parameters, and ASVs  
532 with the opposite trend. Between the *Synechococcus*, ASV1 and ASV5, there were only  
533 3-nucleotide divergence (99.26% identity), but the niche was clearly partitioned  
534 (Supplementary Figure 11). Since *Synechococcus* is one of the best known picoplankton  
535 groups, we checked the taxonomy at a finer resolution using a picocyanobacterial-

536 specific database (Garczarek et al., 2020). In particular, ASV5 presented a 100% identity  
537 match with strain PROS-9-1, belonging to clade Ib, found in cold or temperate waters  
538 (Farrant et al., 2016). ASV1, on the other hand, resulted in a 100% match with members  
539 from multiple clades (clade I, II and III). This multiple match is an example of the  
540 problems with the limited power of the 16S rRNA gene V3-V4 region to resolve species  
541 (Johnson et al., 2019), with multiple clades possibly conforming the same ASVs, which  
542 could be an explanation to the dominant whole-year abundance of this variant. In our  
543 long-term dataset, we found that the peaks of ASV5 correspond to the recurrent yet  
544 temporally restricted *Synechococcus* bloom observed during spring with flow cytometry  
545 (Supplementary Figure 11). Summing up, these results illustrate the diversity of  
546 ecological trends within each genus. *Pelagibacter* ASVs presented similar ecological  
547 patterns, while other groups such as SAR86, HIMB59 and *Synechococcus\_C* presented a  
548 clear ecotype differentiation. These within-genera differences would be hidden using  
549 clustering thresholds or working directly with the aggregation at the OTU 99% or genus  
550 level. Instead, our threshold-free analyses allowed to differentiate the responses at the  
551 ASV level, showing how there are taxa within the same genus presenting differentiated  
552 seasonality patterns even among closely related ASVs.

553

554 **Lack of seasonality at the class level.** It has been hypothesized that bacteria from the  
555 same genus, family, order or even class could share ecological traits and respond  
556 similarly to environmental changes (Martiny et al., 2015; Philippot et al., 2010). In fact,  
557 it is unclear whether phylogenetic ranks are ecologically cohesive, and if true, to what  
558 rank this cohesiveness is maintained (Philippot et al., 2010). These ecological traits could  
559 be clearly determined by phylogenetic history, as is the case of particle versus free living  
560 lifestyle observed in deep ocean waters (Salazar et al., 2015). In the case of surface  
561 coastal waters, the periodic changes in environmental conditions should promote  
562 recurrent niches. We checked how seasonality was taxonomically clustered through  
563 testing the peak normalized power (PN) and its significance at various phylogenetic  
564 levels. By randomly aggregating the ASVs at different ranks, broad patterns of  
565 abundance could emerge coming from cohesive seasonal responses. When we tested  
566 whether this was true, we observed: a) groups that were always non-seasonal, b) groups  
567 with mixed responses with both seasonal and non-seasonal members, and c) groups

568 that were always seasonal. The non-seasonal groups arise either from lack of seasonality  
569 signal or from multiple unsynchronized seasonal signals that generated a random and  
570 weak global signal. This was the case of the analyzed class rank levels, with all the results  
571 being non-seasonal (Figure 5). This seasonality and recurrence was opposite to that  
572 observed in the English Channel, with the Alphaproteobacteria and  
573 Gammaproteobacteria classes presenting a high autocorrelation and, therefore, a  
574 strong seasonal pattern (Faust et al., 2015; Gilbert et al., 2012). A possible explanation  
575 to these differences is that the English Channel presents much higher annual variability  
576 and a higher temperature range than Blanes Bay, therefore likely producing stronger  
577 habitat filtering. Bimodal distributions (seasonal and non-seasonal results) originate in  
578 groups containing ASVs that have strong seasonal trends and other non-seasonal ASVs,  
579 as is the case for Rhodobacterales and Pseudomonadales, copiotrophic groups  
580 occupying many different ecologic niches. *Rhodobacteraceae*, for example, includes  
581 ASVs with seasonality peaks in every season (Supplementary Figure 5). Finally, the  
582 seasonal groups were composed mostly by seasonal ASVs with most or all of them  
583 sharing the same time of the peak. The groups with all ASVs being seasonal could  
584 present more constrained optimal conditions of growth than the groups that appear  
585 randomly or all year-round. Examples of this behavior are the Puniceispirillales (SAR116  
586 clade), a group harboring proteorhodopsin (Lee et al., 2019) and with most of the ASVs  
587 being seasonal and peaking during summer (Lee et al., 2019). Metagenomic and  
588 genome-centric approaches as well as physiological experimentation with available  
589 isolates would help shedding some light on the traits that determine the niche for these  
590 cohesive groups and the differences with other more diverse groups.

591

## 592 **Conclusions**

593 The use of long-term time series and fine resolution of biological units allowed to  
594 compare within-genus ecological distributions. Specifically, we could prove that for  
595 certain genera niche similarity decreased with nucleotide divergence, indicating that  
596 multiple variants coexist due to habitat filtering processes. Additionally, through  
597 modeling of the differential abundance with a variety of environmental parameters, we  
598 unveiled some cases of niche partitioning resulting in different ecotypes producing

599 blooms at different seasons. Finally, the analysis of different seasonality distributions  
600 for each phylogenetic rank (class, order, family, genus) indicated that the class rank was  
601 always non-seasonal for the groups analyzed, and thus ecologically non-coherent. This  
602 study sheds light into the niche specialization of various of the predominant genera in  
603 marine coastal microbial communities.

604

## 605 **Material and methods**

606 **Location and sample collection.** Samples were collected from the Blanes Bay Microbial  
607 Observatory, a station located in the NW Mediterranean sea about 1 km offshore over  
608 a water column of 20 m depth (41°40'N, 2°48'E; Gasol et al. 2016). Sampling was  
609 conducted monthly over 11 years, from January 2003 to December 2013. Water  
610 temperature and salinity were measured *in situ* with a conductivity, temperature and  
611 depth probe, and light penetration was estimated using a Secchi disk. Surface seawater  
612 was pre-filtered through a 200 µm nylon mesh, transported to the laboratory under dim  
613 light in 20 L plastic carboys, and processed within 2 h. Chlorophyll *a* concentration was  
614 measured on GF/F filters extracted with acetone and processed by fluorometry (Yentsch  
615 & Menzel, 1963). The concentrations of inorganic nutrients ( $\text{NO}_3^-$ ,  $\text{NO}_2^-$ ,  $\text{NH}_4^+$ ,  $\text{PO}_4^{3-}$ ,  
616  $\text{SiO}_2$ ) were determined spectrophotometrically using an Alliance Evolution II  
617 autoanalyzer (Grasshoff et al., 1983). The abundances of picocyanobacteria,  
618 heterotrophic bacteria and photosynthetic pico- and nanoeukaryotes were determined  
619 by flow cytometry as described elsewhere (Gasol & Morán, 2016). Additionally, the  
620 abundance of photosynthetic and heterotrophic flagellates of different size ranges were  
621 measured by epifluorescence microscopy of filtrates on 0.6 µm polycarbonate filters  
622 stained with 4',6-diamidino-2-phenylindole. Microbial biomass was collected by filtering  
623 about 4 L of seawater using a peristaltic pump sequentially through a 20 µm nylon mesh  
624 (to remove large eukaryotes), a 3 µm pore-size 47 mm polycarbonate filter and a 0.2 µm  
625 pore-size Sterivex unit (Millipore).

626 **DNA extraction, PCR amplification and sequencing.** DNA was extracted from the  
627 Sterivex unit with lysozyme, proteinase K and sodium dodecyl sulfate, and a standard  
628 phenol-chloroform-isoamyl alcohol protocol as described in Massana et al. (1997). The



629 DNA analyzed here corresponds to the 0.2 to 3  $\mu\text{m}$  fraction of bacterioplankton.  
630 Extracted DNA was purified and concentrated in an Amicon 100 (Millipore) and  
631 quantified in a NanoDrop-1000 spectrophotometer (Thermo Scientific). DNA was stored  
632 at  $-80^{\circ}\text{C}$  and an aliquot from each sample was sent for sequencing to the Research and  
633 Testing Laboratory (Lubbock, TX, USA; <http://rtlgenomics.com/>). Primers 341F (5'-  
634 CCTACGGGNGGCWGCAG-3', Herlemann et al. 2011) and 806RB (5'-  
635 GGACTACNVGGGTWTCTAAT-3', Apprill et al. 2015) were used to amplify the V3-V4  
636 regions of the 16S rRNA gene. A total of 131 samples were successfully sequenced and  
637 used in subsequent analyses.

638 **Sequence processing.** *DADA2* v1.12 was used to differentiate the partial 16S rRNA gene  
639 amplicon sequence variants (ASVs) and to remove chimeras (parameters: maxN = 0,  
640 maxEE = 2,4, truncLen = 230,225; Callahan et al., 2016). Previously, spurious sequences  
641 and primers were trimmed using *cutadapt* v.1.16 (default values; M. Martin 2011).  
642 Taxonomic assignment of the ASVs was performed with IDTAXA from *DECIPHER* v2.14  
643 package (40 confidence, Wright 2016) against the Genome Taxonomy Database (GTDB)  
644 r89 (Parks et al., 2018). IDTAXA reduces over classification, since most contemporary  
645 taxonomical databases are far from comprehensive and often lead to the  
646 misclassification of new groups. The GTDB has the advantage that it incorporates new  
647 data from metagenomic assembled genomes (MAGs) and generates phylogenies based  
648 on 120 single copy genes, resulting in a more robust phylogenetic tree than that created  
649 using only a single marker gene. Additionally, SILVA r138 taxonomy was used for  
650 nomenclature correspondence (Quast et al. 2013; see the correspondence between  
651 databases in Supplementary Table 2). The use of GTDB allowed an increase of  
652 assignment at the genus level (14.6% more sequences reaching the genus rank  
653 assignment) and the differentiation of new groups (e.g. D2472 genus within SAR86).  
654 Furthermore, the ASVs assigned to *Synechococcus* were checked against the Cyanorak  
655 database v2.1 (Garczarek et al., 2020) through 100% BLAST matches. ASVs classified as  
656 Mitochondria or Chloroplast were removed. The ASV sequences were also clustered into  
657 OTUs (Operational Taxonomic Units) at 97 and 99% identity in order to compare  
658 seasonal patterns at different similarity levels. Clustering was performed aligning all  
659 sequences, calculating a nucleotide distance matrix and identifying the clusters through

660 the complete linkage method –maximum nucleotide distance between pairs of ASVs–  
661 using the *DECIPHER* package (Wright, 2016). This nucleotide distance matrix was also  
662 used to calculate the nucleotide divergence between ASVs.

663 **Community data analyses.** We performed all analyses with the R v3.5 language (R Core  
664 Team, 2014). To process the data, we used the *phyloseq* v1.26 and *tidyverse* v1.3  
665 packages (McMurdie & Holmes, 2013; Wickham et al., 2019) and *ggplot2* v3.2 for all  
666 visualizations (Wickham, 2016).

667

668 We defined abundant taxa as those above a 1% relative abundance in at least one  
669 sample as in Campbell et al. (2011). On the contrary, an ASV always below that cutoff  
670 was considered permanently rare. From both abundance groups, we defined three  
671 categories of ASVs based on their occurrence: broad (>75% occurrence), intermediate  
672 (>10% and <75% samples) and narrow (<10% samples) distributions, as termed by  
673 Chafee et al. (2018). The abundant ASVs were further tested as Conditionally Rare Taxa  
674 (CRT) –taxa typically in low abundance that occasionally become prevalent (bimodality  
675 =0.9, relative abundance threshold  $\geq 0.5\%$ )– following the description of Shade et al.,  
676 (2014). The protocols test if each ASV follows a bimodal abundance distribution and if  
677 the values are above a minimum abundance threshold.

678

679 To estimate alpha diversity and beta diversity we used the *breakaway* v4.6 and *divnet*  
680 v0.34 packages respectively (A. Willis et al., 2017; A. D. Willis & Martin, 2020). These  
681 approaches avoid common pitfalls from applying classical ecology indexes (i.e. Chao1,  
682 Shannon, etc.) to microbiome data, which do not consider characteristics such as the  
683 influence of library size and compositionality.

684 **Seasonality data analysis.** For seasonal analyses, the data was considered both at the  
685 month and season level, using for the latter the astronomical season definition as a  
686 delineation. To test whether each of the ASVs displayed seasonality –that is, recurrent  
687 changes over time– we used the lomb scargle periodogram (LSP) as implemented in the  
688 *lomb* package v1.2 (Ruf, 1999). This specific method accounts for unevenly sampled  
689 signals, a typical problem with long-term analyses. The method has already been used

690 for testing the seasonality of marine microbial communities (see Lambert et al., 2018).  
691 Briefly, the LSP determines the spectrum of frequencies (the different sine waves with  
692 periods, for example half a year or one year) composing the dataset. Afterwards,  
693 through data randomizations, it tests whether the observed periods could occur by  
694 chance through a random distribution ( $q \leq 0.01$ , FDR correction). For each ASV, we  
695 obtained the density distribution for each of the periods (a periodogram) and the peak  
696 normalized power (PN). The distribution shows which is the most recurrent period and  
697 the PN value measures the strength of this period. We followed the same criteria than  
698 Lambert et al., (2018) considering the results as seasonal only if PN was above 10 and  $q$   
699  $\leq 0.01$  (Lambert et al., 2018). We only examined ASVs present in at least 5% of the  
700 dataset (i.e. in at least 7 samples), resulting in 873 ASVs (corresponding to 94% of the  
701 total read relative abundance). In addition to the ASV level, we evaluated the seasonality  
702 at the class, order, family and genus taxonomic ranks. For a specific rank level (e.g. class  
703 Alphaproteobacteria), 80% of the ASVs conforming the group were chosen randomly,  
704 aggregated, and the LSP calculated. This process was repeated 300 times to obtain a  
705 distribution and observe how it compared to the LSP value without excluding any ASV.  
706 Out of the 29 classes present in the dataset, only the Alphaproteobacteria,  
707 Gammaproteobacteria and Bacteroidia could be evaluated since these are the classes  
708 that presented more than one order, family and genus ranks with at least 10 ASVs.

709

710 Further, we tested how the ASVs clustered based on the seasonal abundance patterns.  
711 We checked the number of possible clusters through the gap statistic from the *cluster*  
712 v2.1 package, since the expected number of clusters is unknown beforehand (Tibshirani  
713 et al., 2001). This approach tries to find the optimal  $k$  number of clusters by evaluating  
714 the drop of change between the normalized intra-clusters sum of squares distances (a  
715 measure of the compactness of the cluster, see Chapter 5 in Holmes and Huber, 2019).  
716 Once determined, we clustered the data through hierarchical clustering.

717

718 To visually compare the trend of the various seasonal ASVs, each one was fitted through  
719 a generalized additive model (GAM, *mgcv* v1.8 package, Hastie and Tibshirani 1986). A  
720 GAM is a generalized linear model in which the response variable depends linearly on  
721 various unknown smooth functions of some predictor variables. This method can fit

722 polynomic responses without losing statistical relevance. The centered logarithm ratio  
723 values (pseudocount of 1) were fitted along the variable 'day of the year', allowing a  
724 smoothing parameter with 12 knots (the maximum number of curves to fit, being 12 for  
725 the number of months per year, Pedersen et al. 2019). Given the nature of the data  
726 (January evolves towards December and then the year starts again), a cyclic cubic spline  
727 condition was used to merge the start and end of the monthly distribution.

728

729 **Analyses of niche preference and environmental drivers.** To examine how taxa within  
730 genus covary and, therefore, share a realized ecological niche, we used the *propr* v4.2  
731 package (Quinn et al., 2017). This package was created to avoid the common pitfalls of  
732 compositional data analyzing correlation-like measurements. This particularity of our  
733 data creates many spurious correlations between the different taxa in which we cannot  
734 predict the true direction of change (i.e. in a community containing taxa A, B, C, is taxa  
735 A increasing or are taxa B and C decreasing? With relative abundances there is no  
736 distinction; see Gloor et al., 2017). A solution to this problem is to work with ratios  
737 instead of relative abundance. These ratios are usually obtained between the  
738 abundance of the taxon of interest and the geometric mean of all taxa for a specific  
739 sample (centered logarithm ratio, CLR). Then for all the ratios of taxa A and taxa B we  
740 measure the proportionality of change (Rho), which indicates how similar the  
741 abundance changes across many samples are. Two vectors ( $x$  and  $y$ ) completely  
742 proportional (Rho=1) would present a variance of 0 for the ratio. The measure therefore  
743 presents similar properties to the correlation measurement (see Lovell et al. 2015 for a  
744 detailed explanation). The Rho statistic results were filtered with a final estimate of 5%  
745 of false discovery rate (FDR). Within each genus, we compared the Rho value between  
746 pairs of ASVs –acting as a proxy of niche similarity– against the nucleotide divergence  
747 among ASVs to see if there were trends in niche relatedness. A linear model was used  
748 to test which genera presented significant relationships ( $p < 0.05$ ) between nucleotide  
749 divergence and Rho. We analyzed the genera with at least 10 closely related ASVs (at a  
750 maximum of 5 nucleotide divergence) which resulted in a total of 8 genera (out of 93).  
751 For most of these groups, using the V3 and V4 hypervariable regions of the 16S rRNA, 5  
752 nucleotide divergence equals to a median sequence identity of 98.8% between two

753 pairs. This nucleotide distance is the threshold that we use for considering two ASVs as  
754 closely related.

755

756 Finally, we tested which measured environmental parameters drive the patterns among  
757 closely related taxa. From the suite of measured variables, we selected temperature,  
758 total chlorophyll *a* concentration, inorganic nutrient concentrations, and the abundance  
759 of photosynthetic nanoflagellates (PNF) and heterotrophic nanoflagellates (HNF).  
760 Parameter selection was performed based on the expected relevance in modulating the  
761 ASV response (bottom up and top down processes) and also considering the number of  
762 missing values in the dataset. Multicollinearity between the parameters was tested  
763 using the *HH* v3.1 package (Heiberger, 2020). The variables presented a mean variance  
764 inflation factor (VIF) of 2. Only values of VIF exceeding 5 are considered as evidence of  
765 collinearity. To model the association we used the *corncob* v0.1 package (B. D. Martin et  
766 al., 2020), modeling each ASV across the different parameters and considering the  
767 values with an  $FDR \leq 5\%$  as significant. Afterwards, a display of the results was created  
768 with the GAM approach. The GAMs were applied to the data previously normalized  
769 through the centered logarithm ratio, using the geometric mean of the sample as  
770 denominator in the ratio (after adding a pseudocount of 1). Phosphate and nitrate  
771 concentrations, and the abundance of photosynthetic nanoflagellates displayed outliers  
772 in their distributions. The models were run with and without these values, generating  
773 similar results, and therefore we kept the outliers (details not shown).

774

775 **Reproducibility.** The code for sequence data preprocessing, statistical analyses and  
776 visualization is available in the following repository:  
777 [https://github.com/adriaaulaICM/bbmo\\_niche\\_sea](https://github.com/adriaaulaICM/bbmo_niche_sea). Sequence data have been  
778 deposited in the European Nucleotide Archive under project number PRJEB38773.

779

## 780 **Acknowledgments**

781 We thank all the people involved in operating the BBMO, especially Clara Cardelús and  
782 Anselm for facilitating sampling, Vanessa Balagué for laboratory procedures and Ramon  
783 Massana for sharing the HNF data. We also thank the MarBits Bioinformatics platform  
784 of the Institut de Ciències del Mar, in particular Pablo Sánchez for computing support.

785 We additionally thank Maria Touceda-Suárez, Gabriele Schiro and Yongjian Chen from  
786 the Barberán Lab for insightful discussions. This research was funded by grants REMEI  
787 (CTM2015-70340-R), MIAU (RTI2018-101025-B-I00) and ECLIPSE (PID2019-110128RB-  
788 I00) from the Spanish Ministry of Science and Innovation and Grup de Recerca de la  
789 Generalitat de Catalunya 2017SGR/1568. Adrià Auladell was supported by a Spanish FPI  
790 grant.

791

## 792 **Competing interests**

793 No competing interests declared by the authors.

794

795

796

797

798

799

800

801

802

803

804

805

806

807

808

809

810

811

812

813

814

815

816

817

## 818 References

- 819 Alonso-Sáez, L., Balagué, V., Sà, E. L., Sánchez, O., González, J. M., Pinhassi, J.,  
820 Massana, R., Pernthaler, J., Pedrós-Alió, C., & Gasol, J. M. (2007). Seasonality in  
821 bacterial diversity in north-west Mediterranean coastal waters: Assessment through  
822 clone libraries, fingerprinting and FISH. *FEMS Microbiology Ecology*, *60*(1), 98–112.  
823 <https://doi.org/10.1111/j.1574-6941.2006.00276.x>
- 824 Apprill, A., McNally, S., Parsons, R., & Weber, L. (2015). Minor revision to V4 region  
825 SSU rRNA 806R gene primer greatly increases detection of SAR11 bacterioplankton.  
826 *Aquatic Microbial Ecology*, *75*(2), 129–137. <https://doi.org/10.3354/ame01753>
- 827 Buttigieg, P. L., Fadeev, E., Bienhold, C., Hehemann, L., Offre, P., & Boetius, A.  
828 (2018). Marine microbes in 4D — using time series observation to assess the dynamics  
829 of the ocean microbiome and its links to ocean health. *Current Opinion in*  
830 *Microbiology*, *43*, 169–185. <https://doi.org/10.1016/j.mib.2018.01.015>
- 831 Callahan, B. J., Grinevich, D., Thakur, S., Balamotis, M. A., & Yehezkel, T. B. (2020).  
832 Ultra-accurate Microbial Amplicon Sequencing Directly from Complex Samples with  
833 Synthetic Long Reads. *BioRxiv*, 2020.07.07.192286.  
834 <https://doi.org/10.1101/2020.07.07.192286>
- 835 Callahan, B. J., McMurdie, P. J., & Holmes, S. P. (2017). Exact sequence variants  
836 should replace operational taxonomic units in marker-gene data analysis. *The ISME*  
837 *Journal*, *11*(12), 2639–2643. <https://doi.org/10.1038/ismej.2017.119>
- 838 Callahan, B. J., McMurdie, P. J., Rosen, M. J., Han, A. W., Johnson, A. J. A., &  
839 Holmes, S. P. (2016). DADA2: High-resolution sample inference from Illumina  
840 amplicon data. *Nature Methods*, *13*, 581.
- 841 Callahan, B. J., Wong, J., Heiner, C., Oh, S., Theriot, C. M., Gulati, A. S., McGill, S.  
842 K., & Dougherty, M. K. (2019). High-throughput amplicon sequencing of the full-  
843 length 16S rRNA gene with single-nucleotide resolution. *Nucleic Acids Research*,  
844 *47*(18), e103–e103. <https://doi.org/10.1093/nar/gkz569>
- 845 Campbell, B. J., Yu, L., Heidelberg, J. F., & Kirchman, D. L. (2011). Activity of  
846 abundant and rare bacteria in a coastal ocean. *Proceedings of the National Academy of*  
847 *Sciences*, *108*(31), 12776–12781. <https://doi.org/10.1073/pnas.1101405108>
- 848 Chafee, M., Fernández-Guerra, A., Buttigieg, P. L., Gerds, G., Eren, A. M., Teeling,  
849 H., & Amann, R. I. (2018). Recurrent patterns of microdiversity in a temperate coastal  
850 marine environment. *ISME Journal*, *12*(1), 237–252.  
851 <https://doi.org/10.1038/ismej.2017.165>
- 852 Chow, C.-E. T., Sachdeva, R., Cram, J. A., Steele, J. A., Needham, D. M., Patel, A.,  
853 Parada, A. E., & Fuhrman, J. A. (2013). Temporal variability and coherence of euphotic  
854 zone bacterial communities over a decade in the Southern California Bight. *The ISME*  
855 *Journal*, *7*(12), 2259–2273. <https://doi.org/10.1038/ismej.2013.122>
- 856 Cohan, F. M. (2017). Transmission in the Origins of Bacterial Diversity, From Ecotypes  
857 to Phyla. *Microbiology Spectrum*, *5*(5). <https://doi.org/10.1128/microbiolspec.MTBP-0014-2016>
- 859 Cram, J. A., Chow, C.-E. T., Sachdeva, R., Needham, D. M., Parada, A. E., Steele, J.  
860 A., & Fuhrman, J. A. (2015). Seasonal and interannual variability of the marine  
861 bacterioplankton community throughout the water column over ten years. *The ISME*  
862 *Journal*, *9*(3), 563–580. <https://doi.org/10.1038/ismej.2014.153>
- 863 Delmont, T. O., Kiefl, E., Kilinc, O., Esen, O. C., Uysal, I., Rappé, M. S., Giovannoni,  
864 S., & Eren, A. M. (2019). Single-amino acid variants reveal evolutionary processes that  
865 shape the biogeography of a global SAR11 subclade. *ELife*, *8*, e46497.  
866 <https://doi.org/10.7554/eLife.46497>

- 867 Dupont, C. L., Rusch, D. B., Yooseph, S., Lombardo, M.-J., Alexander Richter, R.,  
868 Valas, R., Novotny, M., Yee-Greenbaum, J., Selengut, J. D., Haft, D. H., Halpern, A.  
869 L., Lasken, R. S., Neelson, K., Friedman, R., & Craig Venter, J. (2012). Genomic  
870 insights to SAR86, an abundant and uncultivated marine bacterial lineage. *The ISME*  
871 *Journal*, 6(6), 1186–1199. <https://doi.org/10.1038/ismej.2011.189>
- 872 Eren, A. M., Maignien, L., Sul, W. J., Murphy, L. G., Grim, S. L., Morrison, H. G., &  
873 Sogin, M. L. (2013). Oligotyping: Differentiating between closely related microbial  
874 taxa using 16S rRNA gene data. *Methods in Ecology and Evolution*, 4(12), 1111–1119.  
875 <https://doi.org/10.1111/2041-210X.12114>
- 876 Falkowski, P. (2012). Ocean Science: The power of plankton. *Nature*, 483(7387), S17–  
877 S20. <https://doi.org/10.1038/483S17a>
- 878 Farrant, G. K., Doré, H., Cornejo-Castillo, F. M., Partensky, F., Ratin, M., Ostrowski,  
879 M., Pitt, F. D., Wincker, P., Scanlan, D. J., Iudicone, D., Acinas, S. G., & Garczarek, L.  
880 (2016). Delineating ecologically significant taxonomic units from global patterns of  
881 marine picocyanobacteria. *Proceedings of the National Academy of Sciences*, 113(24),  
882 E3365–E3374. <https://doi.org/10.1073/pnas.1524865113>
- 883 Faust, K., Lahti, L., Gonze, D., de Vos, W. M., & Raes, J. (2015). Metagenomics meets  
884 time series analysis: Unraveling microbial community dynamics. *Current Opinion in*  
885 *Microbiology*, 25(May), 56–66. <https://doi.org/10.1016/j.mib.2015.04.004>
- 886 Friedman, J., & Alm, E. J. (2012). Inferring Correlation Networks from Genomic  
887 Survey Data. *PLoS Computational Biology*, 8(9), e1002687.  
888 <https://doi.org/10.1371/journal.pcbi.1002687>
- 889 Fuhrman, J. A., Cram, J. A., & Needham, D. M. (2015). Marine microbial community  
890 dynamics and their ecological interpretation. *Nature Reviews: Microbiology*, 13(3),  
891 133–146. <https://doi.org/10.1038/nrmicro3417>
- 892 Garczarek, L., Guyet, U., Doré, H., Farrant, G. K., Hoebeke, M., Brillet-Guéguen, L.,  
893 Bisch, A., Ferrieux, M., Siltanen, J., Corre, E., Le Corguillé, G., Ratin, M., Pitt, F. D.,  
894 Ostrowski, M., Conan, M., Siegel, A., Labadie, K., Aury, J.-M., Wincker, P., ...  
895 Partensky, F. (2020). Cyanorak v2.1: A scalable information system dedicated to the  
896 visualization and expert curation of marine and brackish picocyanobacteria genomes.  
897 *Nucleic Acids Research*, gkaa958. <https://doi.org/10.1093/nar/gkaa958>
- 898 Gasol, J. M., Cardelús, C., Morán, X. A. G., Balagué, V., Forn, I., Marrasé, C.,  
899 Massana, R., Pedrós-Alió, C., Sala, M. M., Simó, R., Vaqué, D., & Estrada, M. (2016).  
900 Seasonal patterns in phytoplankton photosynthetic parameters and primary production  
901 at a coastal NW Mediterranean site. *Scientia Marina*, 80SI, 63–77.  
902 <http://dx.doi.org/10.3989/scimar.04480.06E>
- 903 Gasol, J. M., & Morán, X. A. G. (2016). Flow Cytometric Determination of Microbial  
904 Abundances and Its Use to Obtain Indices of Community Structure and Relative  
905 Activity. In T. J. McGenity, K. N. Timmis, & B. Nogales (Eds.), *Hydrocarbon and*  
906 *Lipid Microbiology Protocols: Single-Cell and Single-Molecule Methods* (pp. 159–  
907 187). Springer. [https://doi.org/10.1007/8623\\_2015\\_139](https://doi.org/10.1007/8623_2015_139)
- 908 Ghai, R., Mizuno, C. M., Picazo, A., Camacho, A., & Rodriguez-Valera, F. (2013).  
909 Metagenomics uncovers a new group of low GC and ultra-small marine Actinobacteria.  
910 *Scientific Reports*, 3(1), 1–8. <https://doi.org/10.1038/srep02471>
- 911 Gilbert, J. A., Steele, J. A., Caporaso, J. G., Steinbrück, L., Reeder, J., Temperton, B.,  
912 Huse, S., McHardy, A. C., Knight, R., Joint, I., Somerfield, P., Fuhrman, J. A., & Field,  
913 D. (2012). Defining seasonal marine microbial community dynamics. *The ISME*  
914 *Journal*, 6(2), 298–308. <https://doi.org/10.1038/ismej.2011.107>
- 915 Giner, C. R., Balagué, V., Krabberød, A. K., Ferrera, I., Reñé, A., Garcés, E., Gasol, J.  
916 M., Logares, R., & Massana, R. (2019). Quantifying long-term recurrence in planktonic



- 917 microbial eukaryotes. *Molecular Ecology*, 28(5), 923–935.  
918 <https://doi.org/10.1111/mec.14929>
- 919 Giovannoni, S. J. (2017). SAR11 Bacteria: The Most Abundant Plankton in the Oceans.  
920 *Annual Review of Marine Science*, 9(1), 231–255. [https://doi.org/10.1146/annurev-](https://doi.org/10.1146/annurev-marine-010814-015934)  
921 [marine-010814-015934](https://doi.org/10.1146/annurev-marine-010814-015934)
- 922 Gloor, G. B., Macklaim, J. M., Pawlowsky-Glahn, V., & Egozcue, J. J. (2017).  
923 Microbiome datasets are compositional: And this is not optional. *Frontiers in*  
924 *Microbiology*, 8(NOV), 1–6. <https://doi.org/10.3389/fmicb.2017.02224>
- 925 Grasshoff, K., Ehrhardt, M., & Kremling, K. (1983). *Methods of seawater analysis* (2nd  
926 ed.).
- 927 Guizien, K., Charles, F., Lantoine, F., & Naudin, J.-J. (2007). Nearshore dynamics of  
928 nutrients and chlorophyll during Mediterranean-type flash-floods. *Aquatic Living*  
929 *Resources*, 20(1), 3–14. <https://doi.org/10.1051/alr:2007011>
- 930 Hastie, T., & Tibshirani, R. (1986). Generalized Additive Models. *Statistical Science*,  
931 1(3), 297–310. <https://doi.org/10.1214/ss/1177013604>
- 932 Heiberger, R. M. (2020). *HH: Statistical Analysis and Data Display: Heiberger and*  
933 *Holland*. (3.1-40) [Computer software]. <https://CRAN.R-project.org/package=HH>
- 934 Herlemann, D. P., Labrenz, M., Jürgens, K., Bertilsson, S., Waniek, J. J., & Andersson,  
935 A. F. (2011). Transitions in bacterial communities along the 2000 km salinity gradient  
936 of the Baltic Sea. *The ISME Journal*, 5(10), 1571–1579.  
937 <https://doi.org/10.1038/ismej.2011.41>
- 938 Holmes, S., & Huber, W. (2019). *Modern Statistics for Modern Biology* (1 edition).  
939 Cambridge University Press.
- 940 Horner-Devine, M. C., & Bohannan, B. J. M. (2006). PHYLOGENETIC  
941 CLUSTERING AND OVERDISPERSION IN BACTERIAL COMMUNITIES.  
942 *Ecology*, 87(sp7), S100–S108. [https://doi.org/10.1890/0012-](https://doi.org/10.1890/0012-9658(2006)87[100:PCAOIB]2.0.CO;2)  
943 [9658\(2006\)87\[100:PCAOIB\]2.0.CO;2](https://doi.org/10.1890/0012-9658(2006)87[100:PCAOIB]2.0.CO;2)
- 944 Hutchinson, G. E. (1957). Concluding Remarks. *Cold Spring Harbor Symposia on*  
945 *Quantitative Biology*, 22(0), 415–427. <https://doi.org/10.1101/SQB.1957.022.01.039>
- 946 Johnson, J. S., Spakowicz, D. J., Hong, B.-Y., Petersen, L. M., Demkowicz, P., Chen,  
947 L., Leopold, S. R., Hanson, B. M., Agresta, H. O., Gerstein, M., Sodergren, E., &  
948 Weinstock, G. M. (2019). Evaluation of 16S rRNA gene sequencing for species and  
949 strain-level microbiome analysis. *Nature Communications*, 10(1), 5029.  
950 <https://doi.org/10.1038/s41467-019-13036-1>
- 951 Ladau, J., & Elie-Fadrosh, E. A. (2019). Spatial, Temporal, and Phylogenetic Scales of  
952 Microbial Ecology. *Trends in Microbiology*, 0(0).  
953 <https://doi.org/10.1016/j.tim.2019.03.003>
- 954 Lambert, S., Tragin, M., Lozano, J.-C., Ghiglione, J.-F., Vaultot, D., Bouget, F.-Y., &  
955 Galand, P. E. (2018). Rhythmicity of coastal marine picoeukaryotes, bacteria and  
956 archaea despite irregular environmental perturbations. *The ISME Journal*.  
957 <https://doi.org/10.1038/s41396-018-0281-z>
- 958 Lee, J., Kwon, K. K., Lim, S.-I., Song, J., Choi, A. R., Yang, S.-H., Jung, K.-H., Lee, J.-  
959 H., Kang, S. G., Oh, H.-M., & Cho, J.-C. (2019). Isolation, cultivation, and genome  
960 analysis of proteorhodopsin-containing SAR116-clade strain Candidatus  
961 *Puniceispirillum marinum* IMCC1322. *Journal of Microbiology*, 57(8), 676–687.  
962 <https://doi.org/10.1007/s12275-019-9001-2>
- 963 Logares, R., Deutschmann, I. M., Junger, P. C., Giner, C. R., Krabberød, A. K.,  
964 Schmidt, T. S. B., Rubinat-Ripoll, L., Mestre, M., Salazar, G., Ruiz-González, C.,  
965 Sebastián, M., de Vargas, C., Acinas, S. G., Duarte, C. M., Gasol, J. M., & Massana, R.  
966 (2020). Disentangling the mechanisms shaping the surface ocean microbiota.

- 967 *Microbiome*, 8(1), 55. <https://doi.org/10.1186/s40168-020-00827-8>
- 968 Lovell, D., Pawlowsky-Glahn, V., Egozcue, J. J., Marguerat, S., & Bähler, J. (2015).  
969 Proportionality: A Valid Alternative to Correlation for Relative Data. *PLoS*  
970 *Computational Biology*, 11(3), e1004075. <https://doi.org/10.1371/journal.pcbi.1004075>
- 971 Martijn, J., Vosseberg, J., Guy, L., Offre, P., & Ettema, T. J. G. (2018). Deep  
972 mitochondrial origin outside the sampled alphaproteobacteria. *Nature*, 557(7703), 101–  
973 105. <https://doi.org/10.1038/s41586-018-0059-5>
- 974 Martin, B. D., Witten, D., & Willis, A. D. (2020). Modeling microbial abundances and  
975 dysbiosis with beta-binomial regression. *Annals of Applied Statistics*, 14(1), 94–115.  
976 <https://doi.org/10.1214/19-AOAS1283>
- 977 Martin, M. (2011). Cutadapt removes adapter sequences from high-throughput  
978 sequencing reads. *EMBnet.Journal*, 17(1), 10. <https://doi.org/10.14806/ej.17.1.200>
- 979 Martiny, J. B. H., Jones, S. E., Lennon, J. T., & Martiny, A. C. (2015). Microbiomes in  
980 light of traits: A phylogenetic perspective. *Science*, 350(6261).  
981 <https://doi.org/10.1126/science.aac9323>
- 982 Massana, R., Murray, A. E., Preston, C. M., & Delong, E. F. (1997). Vertical  
983 distribution and phylogenetic characterization of marine planktonic Archaea in the  
984 Santa Barbara Channel. *Applied and Environmental Microbiology*, 63(1), 50–56.
- 985 McMurdie, P. J., & Holmes, S. (2013). Phyloseq: An R package for reproducible  
986 interactive analysis and graphics of microbiome census data. *PLoS ONE*, 8(4).  
987 <https://doi.org/10.1371/journal.pone.0061217>
- 988 Mestre, M., Borrull, E., Sala, M. M., & Gasol, J. M. (2017). Patterns of bacterial  
989 diversity in the marine planktonic particulate matter continuum. *The ISME Journal*,  
990 11(4), 999–1010. <https://doi.org/10.1038/ismej.2016.166>
- 991 Needham, D. M., Fichot, E. B., Wang, E., Berdjeb, L., Cram, J. A., Fichot, C. G., &  
992 Fuhrman, J. A. (2018). Dynamics and interactions of highly resolved marine plankton  
993 via automated high-frequency sampling. *The ISME Journal*, 12(10), 2417–2432.  
994 <https://doi.org/10.1038/s41396-018-0169-y>
- 995 Nunes, S., Latasa, M., Gasol, J. M., & Estrada, M. (2018). Seasonal and interannual  
996 variability of phytoplankton community structure in a Mediterranean coastal site.  
997 *Marine Ecology Progress Series*, 592, 57–75. <https://doi.org/10.3354/meps12493>
- 998 Parks, D. H., Chuvochina, M., Waite, D. W., Rinke, C., Skarshewski, A., Chaumeil, P.-  
999 A., & Hugenholtz, P. (2018). A standardized bacterial taxonomy based on genome  
1000 phylogeny substantially revises the tree of life. *Nature Biotechnology*, 36(10), 996–  
1001 1004. <https://doi.org/10.1038/nbt.4229>
- 1002 Pedersen, E. J., Miller, D. L., Simpson, G. L., & Ross, N. (2019). Hierarchical  
1003 generalized additive models in ecology: An introduction with mgcv. *PeerJ*, 7, e6876.  
1004 <https://doi.org/10.7717/peerj.6876>
- 1005 Philippot, L., Andersson, S. G. E., Battin, T. J., Prosser, J. I., Schimel, J. P., Whitman,  
1006 W. B., & Hallin, S. (2010). The ecological coherence of high bacterial taxonomic ranks.  
1007 *Nature Reviews Microbiology*, 8(7), 523–529. <https://doi.org/10.1038/nrmicro2367>
- 1008 Quast, C., Pruesse, E., Yilmaz, P., Gerken, J., Schweer, T., Yarza, P., Peplies, J., &  
1009 Glöckner, F. O. (2013). The SILVA ribosomal RNA gene database project: Improved  
1010 data processing and web-based tools. *Nucleic Acids Research*, 41(Database issue),  
1011 D590–D596. <https://doi.org/10.1093/nar/gks1219>
- 1012 Quinn, T. P., Richardson, M. F., Lovell, D., & Crowley, T. M. (2017). propr: An R-  
1013 package for Identifying Proportionally Abundant Features Using Compositional Data  
1014 Analysis. *Scientific Reports*, 7(1), 1–9. <https://doi.org/10.1038/s41598-017-16520-0>
- 1015 R Core Team. (2014). *R: A language and environment for statistical computing*. R  
1016 Foundation for Statistical Computing, Vienna, Austria. <https://www.r-project.org/>

- 1017 Ruf, T. (1999). The Lomb-Scargle Periodogram in Biological Rhythm Research:  
1018 Analysis of Incomplete and Unequally Spaced Time-Series. *Biological Rhythm*  
1019 *Research*, 30(2), 178–201. <https://doi.org/10.1076/brhm.30.2.178.1422>
- 1020 Salazar, G., Cornejo-Castillo, F. M., Benítez-Barrios, V., Fraile-Nuez, E., Álvarez-  
1021 Salgado, X. A., Duarte, C. M., Gasol, J. M., & Acinas, S. G. (2015). Global diversity  
1022 and biogeography of deep-sea pelagic prokaryotes. *The ISME Journal*, 1–13.  
1023 <https://doi.org/10.1038/ismej.2015.137>
- 1024 Salter, I., Galand, P. E., Fagervold, S. K., Lebaron, P., Obernosterer, I., Oliver, M. J.,  
1025 Suzuki, M. T., & Tricoire, C. (2015). Seasonal dynamics of active SAR11 ecotypes in  
1026 the oligotrophic Northwest Mediterranean Sea. *The ISME Journal*, 9(2), 347–360.  
1027 <https://doi.org/10.1038/ismej.2014.129>
- 1028 Shade, A., Jones, S. E., Caporaso, J. G., Handelsman, J., Knight, R., Fierer, N., &  
1029 Gilbert, A. (2014). Conditionally rare taxa disproportionately contribute to temporal  
1030 changes in microbial diversity. *MBio*, 5(4), 1–9. <https://doi.org/10.1128/mBio.01371-14>
- 1031 Steinberg, D. K., Carlson, C. A., Bates, N. R., Johnson, R. J., Michaels, A. F., & Knap,  
1032 A. H. (2001). Overview of the US JGOFS Bermuda Atlantic Time-series Study  
1033 (BATS): A decade-scale look at ocean biology and biogeochemistry. *Deep Sea*  
1034 *Research Part II: Topical Studies in Oceanography*, 48(8–9), 1405–1447.  
1035 [https://doi.org/10.1016/S0967-0645\(00\)00148-X](https://doi.org/10.1016/S0967-0645(00)00148-X)
- 1036 Sunagawa, S., Coelho, L. P., Chaffron, S., Kultima, J. R., Labadie, K., Salazar, G.,  
1037 Djahanschiri, B., Zeller, G., Mende, D. R., Alberti, A., Cornejo-Castillo, F. M., Costea,  
1038 P. I., Cruaud, C., D’Ovidio, F., Engelen, S., Ferrera, I., Gasol, J. M., Guidi, L.,  
1039 Hildebrand, F., ... Bork, P. (2015). Ocean plankton. Structure and function of the global  
1040 ocean microbiome. *Science*, 348(6237), 1261359.  
1041 <https://doi.org/10.1126/science.1261359>
- 1042 Tibshirani, R., Walther, G., & Hastie, T. (2001). Estimating the number of clusters in a  
1043 data set via the gap statistic. *Journal of the Royal Statistical Society: Series C (Applied*  
1044 *Statistics)*, 63(2), 411–423. <https://doi.org/10.1111/1467-9868.00293>
- 1045 Tromas, N., Taranu, Z. E., Martin, B. D., Willis, A., Fortin, N., Greer, C. W., &  
1046 Shapiro, B. J. (2018). Niche Separation Increases With Genetic Distance Among  
1047 Bloom-Forming Cyanobacteria. *Frontiers in Microbiology*, 9, 438.  
1048 <https://doi.org/10.3389/fmicb.2018.00438>
- 1049 VanInsberghe, D., Arevalo, P., Chien, D., & Polz, M. F. (2020). How can microbial  
1050 population genomics inform community ecology? *Philosophical Transactions of the*  
1051 *Royal Society B*, 375(1798), 20190253. <https://doi.org/10.1098/rstb.2019.0253>
- 1052 Viklund, J., Martijn, J., Ettema, T. J. G., & Andersson, S. G. E. (2013). Comparative  
1053 and Phylogenomic Evidence That the Alphaproteobacterium HIMB59 Is Not a Member  
1054 of the Oceanic SAR11 Clade. *PLoS ONE*, 8(11), e78858.  
1055 <https://doi.org/10.1371/journal.pone.0078858>
- 1056 Wickham, H. (2016). *ggplot2: Elegant graphics for data analysis*. Springer-Verlag New  
1057 York. <https://ggplot2.tidyverse.org>
- 1058 Wickham, H., Averick, M., Bryan, J., Chang, W., McGowan, L. D., François, R.,  
1059 Golemund, G., Hayes, A., Henry, L., Hester, J., Kuhn, M., Pedersen, T. L., Miller, E.,  
1060 Bache, S. M., Müller, K., Ooms, J., Robinson, D., Seidel, D. P., Spinu, V., ... Yutani,  
1061 H. (2019). Welcome to the tidyverse. *Journal of Open Source Software*, 4(43), 1686.  
1062 <https://doi.org/10.21105/joss.01686>
- 1063 Willis, A., Bunge, J., & Whitman, T. (2017). Improved detection of changes in species  
1064 richness in high diversity microbial communities. *Journal of the Royal Statistical*  
1065 *Society: Series C (Applied Statistics)*, 66(5), 963–977.  
1066 <https://doi.org/10.1111/rssc.12206>

1067 Willis, A. D., & Martin, B. D. (2020). Estimating diversity in networked ecological  
1068 communities. *Biostatistics*, kxaa015. <https://doi.org/10.1093/biostatistics/kxaa015>  
1069 Wright, E., S. (2016). Using DECIPHER v2.0 to Analyze Big Biological Sequence Data  
1070 in R. *The R Journal*, 8(1), 352. <https://doi.org/10.32614/RJ-2016-025>  
1071 Yentsch, C. S., & Menzel, D. W. (1963). A method for the determination of  
1072 phytoplankton chlorophyll and phaeophytin by fluorescence. *Deep Sea Research and*  
1073 *Oceanographic Abstracts*, 10(3), 221–231. <https://doi.org/10.1016/0011->  
1074 [7471\(63\)90358-9](https://doi.org/10.1016/0011-7471(63)90358-9)  
1075  
1076  
1077  
1078  
1079  
1080  
1081  
1082  
1083  
1084  
1085  
1086  
1087  
1088  
1089  
1090  
1091  
1092  
1093  
1094  
1095  
1096  
1097  
1098  
1099  
1100  
1101  
1102  
1103

1104 **Supplementary Table legends**

1105 **Supplementary Table 1:** Taxonomy and occurrence distribution of each individual ASV.

1106 ASV name, taxonomy (from domain to genus), presence (abundant or rare), distribution

1107 (broad, intermediate or narrow), Conditionally Rare taxa (CRT) and ASV seasonality.

1108

1109 **Supplementary Table 2:** Correspondence between the GTDB and SILVA genus

1110 nomenclature. The first two columns correspond to the genus, family and order from

1111 the GTDB r89, and the next two provide the same information in SILVA DB r138. N.

1112 seasonal indicates the number of seasonal ASVs from the total of ASVs tested. Finally,

1113 the column "General Information Genus" provides useful information behind some of

1114 the changes in the nomenclature.

1115

1116 **Supplementary Table 3:** Linear regression coefficients for each genus between Rho

1117 proportionality values and nucleotide divergence. Df, degrees of freedom; logLik, log

1118 likelihood; AIC, Akaike Information Criterion; BIC Bayesian Information Criterion;

1119 deviance; df.residual, residual degrees of freedom; pval.term,  $p$  values of the coefficient;

1120 R.square.
